# Supplementary material for: Ultrasensitive plasma-based monitoring of tumor burden using machine learning-guided signal enrichment
Source: PubMed Central journal article supplement (PMC7616143; doi:10.1038/s41591-024-03040-4), 2024-06-14
Supplement: EMS197223-supplement-Supplementary_Fig__1.pdf [file EMS197223-supplement-Supplementary_Fig__1.pdf]

---

# Ultrasensitive plasma-based monitoring of tumor burden using machine-learning-guided signal enrichment

---

In the format provided by the authors and unedited

---

16 **Evaluation of neural network interpretability for MRD-EDGE<sup>SNV</sup>.** To assess behavior of  
17 individual MRD-EDGE<sup>SNV</sup> features within a neural network, we converted all features to tabular  
18 values (see **Comparison of MRD-EDGE<sup>SNV</sup> deep learning classifier performance to other**  
19 **machine learning models, Methods**) and trained MLPs for CRC, melanoma, and NSCLC  
20 according to the training sample paradigms in Supplementary Table 1. Aggregate feature  
21 importances (**Supplementary Fig. 1a**) and individual feature Shapley values (**Supplementary**  
22 **Fig. 1b**) were obtained from the application of GradientExplainer from the python SHAP<sup>85</sup> library  
23 (v0.37.0) to the trained model from each cancer type.

24 **Discrimination of MRD-EDGE between in silico mixing TFs.** We generated *in silico* TF  
25 admixtures (Methods) from the melanoma plasma sample MEL-100 mixed into cfDNA from an  
26 individual with no known cancer (**Fig. 1e**, Supplementary Table 4). In this *in silico* study, MRD-  
27 EDGE<sup>SNV</sup> provided effective discrimination between mixing fractions, demonstrating accurate  
28 quantification of tumor burden (SNV AUCs in **Supplementary Fig. 3a**, *P* values from Student's *t*-  
29 test in **Supplementary Fig. 3b**). We further evaluated discrimination between mix fractions for  
30 the read depth, BAF, and fragment length entropy classifiers of MRD-EDGE<sup>CNV</sup> (**Supplementary**  
31 **Fig. 4**).

32 **Application of tumor-informed MRD-EDGE to HiSeq re-analysis cohorts.** Though MRD-  
33 EDGE was trained on Illumina NovaSeq plasma samples, to demonstrate generalizability we also  
34 tested the platform on our previously reported<sup>14</sup> clinical cohort of Illumina HiSeq plasma samples  
35 from patients with CRC ("HiSeq CRC" *n*=19 patients, including 6 with microsatellite instability  
36 (MSI), Supplementary Table 6), compared with controls without known cancer (*n*=38) and from  
37 the same sequencing platform. As further proof of generalizability, we used the same detection  
38 thresholds as in our preoperative stage III CRC NovaSeq cohort. Composite MRD-EDGE and  
39 MRD-EDGE<sup>SNV</sup> produced comparable performance to MRDetect in the preoperative setting  
40 (**Supplementary Fig. 5**). Moreover, the ability to evaluate cnLOH with MRD-EDGE<sup>CNV</sup> allowed

41 us to apply CNV-based detection to 18 / 19 samples in this cohort, compared to 15 / 19 samples  
42 with MRDetect<sup>CNV</sup> without any loss of performance. Postoperative plasma was drawn for each of  
43 these patients at a median of 43 days after surgery. In this postoperative setting, MRD-EDGE  
44 was highly specific for disease recurrence in microsatellite stable (MSS,  $n=13$ ) samples  
45 (**Supplementary Fig. 5**) and was associated with shorter disease-free survival over a median  
46 follow up of 49 months (range 18-76). False positives in the postoperative setting were confined  
47 to a patient who received adjuvant chemotherapy and a patient with overall survival time below  
48 the median time to recurrence in CRC<sup>86</sup>. Among the broader cohort, association between  
49 postoperative ctDNA detection with MRD-EDGE and shorter disease-free survival did not reach  
50 statistical significance ( $P=0.0546$ , **Supplementary Fig. 5**) due to false positives among MSI  
51 samples with MRD-EDGE (6 of 6 MSI samples detected with MRD-EDGE<sup>SNV</sup>). This suggests that  
52 due to distinct mutational signatures<sup>18</sup>, patients with MSI tumors may require a separate SNV  
53 training paradigm or should only be evaluated with MRD-EDGE<sup>CNV</sup>, which detected no false  
54 positives among MSI samples. Integrating the two CRC cohorts in a survival analysis, MRD-  
55 EDGE was highly sensitive and specific for disease recurrence in patients with MSS tumors  
56 ( $P=7*10^{-4}$  logrank, **Supplementary Fig. 6**), demonstrating the outstanding potential for MRD  
57 detection with plasma WGS.

58 To demonstrate generalizability in another tumor type, we applied MRD-EDGE to a cohort of  
59 early-stage NSCLC patients evaluated previously<sup>14</sup> (“HiSeq NSCLC”, Supplementary Table 5).  
60 Composite MRD-EDGE and MRD-EDGE<sup>SNV</sup> performed similarly to MRDetect in the preoperative  
61 setting while MRD-EDGE<sup>CNV</sup> had superior performance (**Supplementary Fig. 7**). MRD-EDGE  
62 performed comparably to MRDetect in the detection of postoperative MRD associated with shorter  
63 disease-free survival (logrank HR 6.4,  $P=1.2*10^{-2}$  for MRD-EDGE vs HR 8.4,  $P=3.7*10^{-3}$  for  
64 MRDetect, **Supplementary Fig. 8**).

65 **Assessing statistical significance for adenoma detections.** Detections for MRD-EDGE for  
66 pT1 lesions and adenomas were significantly above our expected false positive rate of 5%  
67 (binomial  $P=3*10^{-4}$  and  $1.1*10^{-3}$ , respectively, accounting for detection opportunities with both  
68 MRD-EDGE<sup>SNV</sup> and MRD-EDGE<sup>CNV</sup>). To more stringently demonstrate detection, we evaluated  
69 our detections against the lower limit of the 95% confidence intervals for specificity for MRD-  
70 EDGE<sup>SNV</sup> (0.934) and MRD-EDGE<sup>CNV</sup> (0.923) and found that detections surpassed the expected  
71 false positive rate in both cases (SNV: binomial  $P=1.2*10^{-3}$  for pT1 lesions and  $4.6*10^{-3}$  for  
72 adenomas; CNV: binomial  $P=2.6*10^{-3}$  for pT1 lesions and  $1.0*10^{-2}$  for adenomas).

73 For the detection of ctDNA shedding in adenomas and pT1 lesions, we further sought to provide  
74 orthogonal validation for our TF estimates using our *in silico* mixing analysis for CRC (**Extended**  
75 **Data Fig. 2a**), as the TFs of these lesions may be of interest to early detection efforts. For TF  
76 admixtures at  $1*10^{-5}$ , comparable to the median adenoma estimated TF of  $8.0*10^{-6}$ , 95%  
77 confidence interval was  $7.3*10^{-6}$ - $1.1*10^{-5}$  as calculated from a normal distribution and standard  
78 error of the mean of  $n=27$  seeds with  $\geq 1$  fragment detected, similar to the TF range for detected  
79 adenomas range  $5.7*10^{-6}$ - $1.6*10^{-5}$ , from **Tumor-informed MRD-EDGE detects ctDNA**  
80 **shedding in precancerous adenomas and minimally invasive pT1 carcinomas**). This  
81 suggests that an assay sensitivity of  $1*10^{-5}$  may be needed to detect precancerous lesions.

82 **Specificity threshold for de novo mutation calling.** To determine an appropriate *de novo*  
83 specificity threshold for our MRD-EDGE<sup>SNV</sup> deep learning classifier (**Fig. 1d**) in melanoma we  
84 used the same *in silico* admixtures as in the tumor-informed setting (validation melanoma sample  
85 MEL-100 admixed with a held-out healthy control plasma sample, **Fig. 1e**). We compared signal-  
86 to-noise enrichment with detection AUC at different specificity thresholds imposed on the MRD-  
87 EDGE<sup>SNV</sup> ensemble model output to find an optimal threshold for *de novo* classification of  
88 ultrasensitive TFs (TF  $5*10^{-5}$ ). As expected, our empirically chosen threshold in the *de novo*

89 classification context (0.995) was higher than the balanced threshold (0.5) used in the tumor-  
90 informed setting (**Extended Data Fig. 9a-b**, Methods).

### 91 **MRD-EDGE additional fragment classification and generalizability analyses**

92 **Evaluation of fragment-level classification on sample level results.** To evaluate the  
93 contribution of MRD-EDGE<sup>SNV</sup> fragment-level classification to sample level results, we compared  
94 our tumor-informed WGS pipeline with and without application of the MRD-EDGE<sup>SNV</sup> individual  
95 fragment classifier (“No WGS error suppression). All quality filters and recurrent artifact filters  
96 were conserved between the two approaches. Fragment-level classification with MRD-EDGE<sup>SNV</sup>  
97 significantly improved sensitivity vs. controls in preoperative stage III CRC plasma samples  
98 (**Supplementary Fig. 12**).

99 **Fragment-level variability for non-cancer (control) samples.** We performed several analyses  
100 to demonstrate generalizability between non-cancer (control) populations at the fragment level for  
101 MRD-EDGE<sup>SNV</sup>. In our NovaSeq stage III perioperative CRC cohort, our ctDNA detection  
102 threshold of 95% specificity against held-out controls was highly conserved among 4 control noise  
103 distributions including: (i) Aarhus controls (95.0% in  $n=40$  controls, 5 controls were held out for  
104 CRC SNV model training, sequenced on Illumina NovaSeq with 1.5 flow cells at Aarhus  
105 University), (ii) NYGC controls (94.9% in  $n=35$  controls, sequenced on Illumina NovaSeq with  
106 v1.0 flow cells at the New York Genome Center), (iii) HiSeq controls, (95.4% in  $n=38$  controls,  
107 sequenced on Illumina HiSeq X at the New York Genome Center), and (iv) a cross-patient noise  
108 distribution (95.2%  $n=14$  cross patient controls from patients with stage III colorectal cancer,  
109 sequenced on Illumina NovaSeq with v1.5 flow cells at Aarhus University, **Supplementary Fig.**  
110 **13**). Therefore, applying the prespecified Z score threshold defined using the NovaSeq stage III  
111 CRC cohort provided highly conserved estimates of the sensitivity (100%) and specificity (~95%)  
112 when investigated in 4 different control noise distributions. This indicates that MRD-EDGE<sup>SNV</sup>  
113 sample classification is highly generalizable with different control cohorts. Furthermore, our

114 analysis indicates that future implementations of MRD-EDGE<sup>SNV</sup> are unlikely to need a new panel  
115 of control samples at every application of the platform, though this will have to be confirmed in  
116 future studies. We further found broadly similar side-by-side trends for detection rate noise  
117 distributions for each patient-specific mutation profile ( $n=15$ ) (**Supplementary Fig. 14a**) and  
118 detection rate variance (**Supplementary Fig. 14b**).

119 As a further evaluation of MRD-EDGE<sup>SNV</sup> generalizability, we assessed the performance of our  
120 MRD-EDGE<sup>SNV</sup> platform on HiSeq cancer samples against non-cancer control plasma samples  
121 sequenced on 2 different sequencing platforms. We applied our prespecified NovaSeq stage III  
122 perioperative CRC cohort Z score detection threshold (95% specificity against held-out controls  
123 from the same center and sequencing platform), to the same controls used in the stage III CRC  
124 analysis (Aarhus controls,  $n=40$ ), as well as the HiSeq controls ( $n=38$ ) as described above in  
125 **“Application of tumor-informed MRD-EDGE to HiSeq re-analysis cohorts”**. We found similar  
126 AUC when either set of cohorts was used as the noise distribution for the patient-specific SNV  
127 profiles (Aarhus controls AUC 0.97, 95% CI: 0.92 - 1.00, HiSeq controls AUC 0.98, 95% CI: 0.95  
128 - 1.00; **Supplementary Fig. 15**). The prespecified 95% specificity threshold from our NovaSeq  
129 stage III CRC analysis reflected a Z Score specificity of 0.963 in Aarhus controls and 0.957 in  
130 HiSeq controls.

131 **Evaluating for fragment-level biases due to sequencing batch.** We evaluated potential batch  
132 effects related to DNA extraction date, library preparation date and sequencing date in MRD-  
133 EDGE<sup>SNV</sup> sample level classification. We performed an analysis of variance (ANOVA) on  
134 neoadjuvant NSCLC plasma, as these samples were processed in our laboratory at different  
135 timepoints over two years (July 2020 to May 2022). No significant differences were found for  
136 extraction, library preparation dates, or sequencing dates. However, time of collection within  
137 treatment course, such as whether a sample was drawn prior to treatment, during radiation, or  
138 postoperatively, produced statistically significant differences in the prediction of MRD-EDGE<sup>SNV</sup> Z

139 score (P=0.014, Supplementary Table 16), which conforms to our expectation of changing plasma  
140 TF throughout treatment. Standard checking plots are included as **Supplementary Fig. 16**.

141 **Evaluating the role of sequencing batch in MRD-EDGE<sup>SNV</sup> performance.** We performed a  
142 series of training experiments on the melanoma classifier, in which cases and controls are  
143 sequenced in the same batch, to evaluate whether training batch in the positive or negative label  
144 confounds results. We compared our original training paradigm to a series of different control  
145 batches (**Supplementary Fig. 17**). We found that the sequencing batch of the negative label  
146 (whether on same batch or different batches) did not significantly affect model performance, as  
147 validation accuracy scores remained similar for each group. As a negative control, we trained a  
148 model in which the positive and negative labels in training are from separate batches (as in  
149 experiment two). However, in the validation set, the positive and negative labels are both derived  
150 from control samples. The validation positive labels are non-cancer controls from the same batch  
151 as the melanoma sample in the training positive label, and the negative labels are from the same  
152 batch as the training negative label. Therefore, if the model learned technical features of the  
153 positive label batch or the negative label batch, we would expect the validation set to show  
154 performance above noise. Instead, validation accuracy approached 0.5, suggesting that the  
155 model does not learn significant differences between control batches (**Supplementary Fig. 17**).

156 **Read depth PON generalizability.** To ensure generalizability of read-depth PONs among control  
157 samples, we performed random sampling of plasma samples in the PON vs. held-out of the PON  
158 and evaluated results in pretreatment, preoperative plasma samples from our neoadjuvant  
159 immunotherapy and SBRT NSCLC cohort. Compared to results from our original PON (**Extended**  
160 **Data Fig. 4a**), we saw no significant differences in preoperative sensitivity or AUC performance  
161 (**Supplementary Data Fig. 18**).

162 **Evaluation of drop-out rate and training sample selection in MRD-EDGE<sup>SNV</sup>.** To mitigate  
163 overfitting, we locked our model at training and validated performance in held-out validation and

164 test sets for each cancer type (Supplementary Table 1). We further performed a sparsity analysis  
165 in which we evaluated accuracy at different dropout rates, which randomly drop nodes within  
166 neural networks to reduce overfitting<sup>87</sup>, in our melanoma held-out validation set. Here, we found  
167 that our dropout rate of 0.5 appeared to be appropriately fit (not under or overfit) for optimal  
168 performance (**Supplementary Fig. 19a**). Finally, we performed random sampling with  
169 replacement in CRC to confirm that our number of training samples was poised for optimal  
170 performance. We found that performance (as measured by classification accuracy) in our  
171 fragment-based training paradigm plateaued at 4 or higher positive label training samples or  
172 150,000 total ctDNA fragments, suggesting that training with a small number of clinical samples  
173 is appropriate due to the large number of fragments in high-burden disease (**Supplementary**  
174 **Data Fig. 19b**).

175



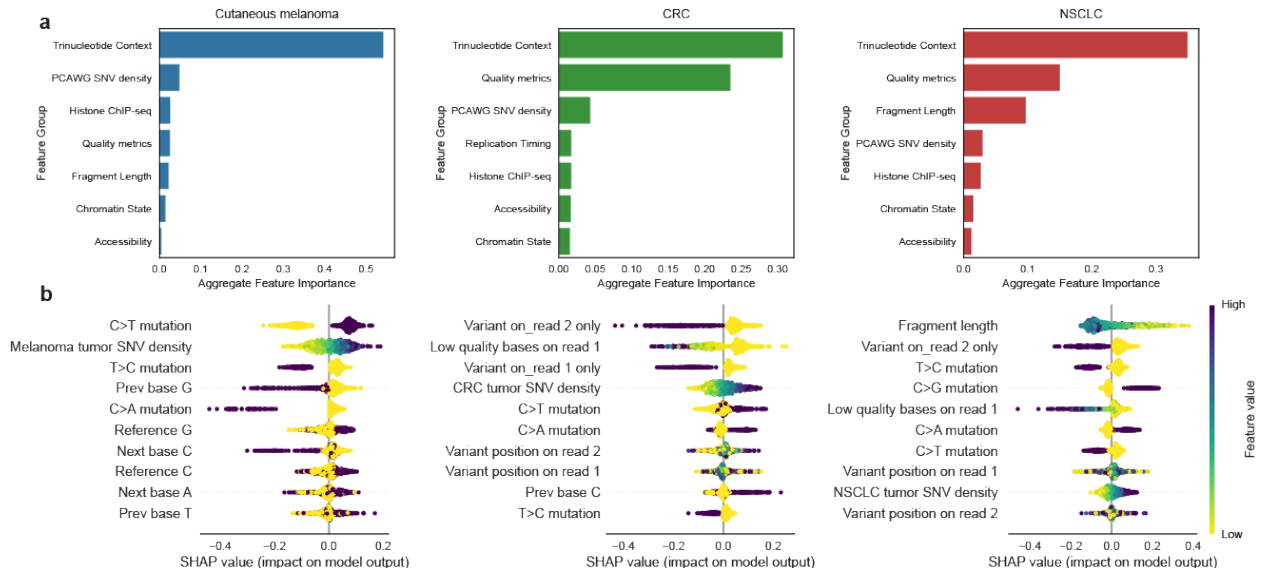

177  
178

179 **Supplementary Fig. 1: Shapley feature importance for MRD-EDGE<sup>SNV</sup> in different tumor**  
180 **types**

181 **a)** Shapley feature importance plots for MRD-EDGE<sup>SNV</sup> features in (left) cutaneous  
 182 melanoma (middle) CRC, and (right) NSCLC. SNV model features were converted to  
 183 tabular features for Shapley evaluation. Feature groups were aggregated through sum of  
 184 mean feature importance to determine category-level aggregate feature importance. **B)**  
 185 Top ten individual Shapley features in (left) cutaneous melanoma (middle) CRC, and  
 186 (right) NSCLC ordered according to importance (impact on model output). Each X-axis  
 187 point is a Shapley value (Methods) for a feature within the neural network at a given feature  
 188 value. Color represents the value of the feature from low to high.

189  
190

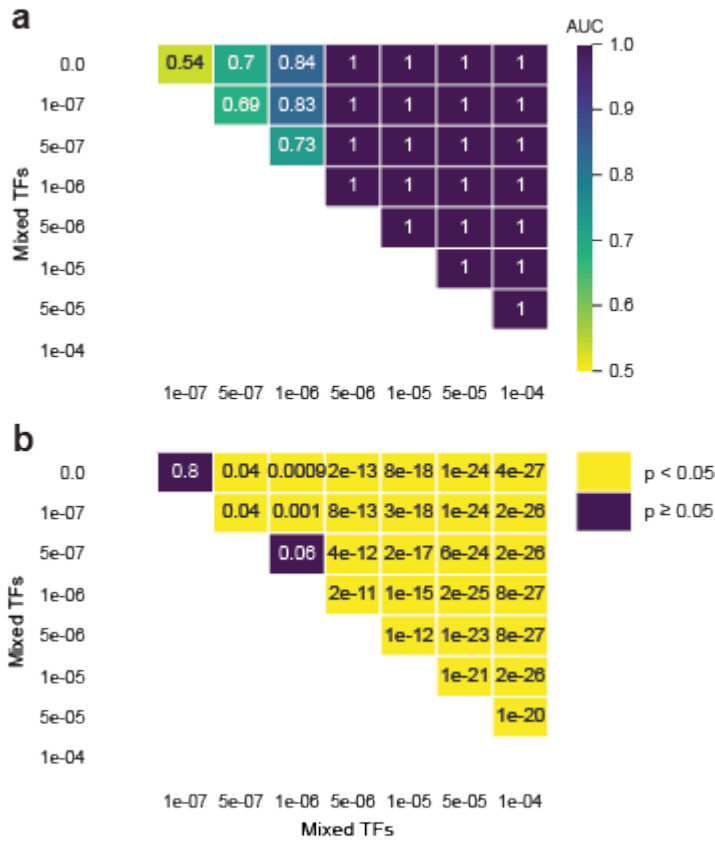

192

193 **Supplementary Fig. 2: Discriminating *in silico* mix fractions with MRD-EDGE<sup>SNV</sup>**

194 *In silico* studies of cfDNA from the metastatic cutaneous melanoma sample MEL-100 mixed into  
 195 cfDNA from a healthy plasma sample (CTRL-216) at mixing fractions TF = 10<sup>-7</sup>–10<sup>-4</sup> at 16X  
 196 coverage depth, performed in 20 technical replicates with independent sampling seeds. **a)** An  
 197 AUC heatmap benchmarks discrimination between different mixed TFs as measured by MRD-  
 198 EDGE<sup>SNV</sup> detection rate. **b)** A P-value heatmap benchmarks significant differences between  
 199 detection rates at different mixed TFs (two-sided Student’s t-test).

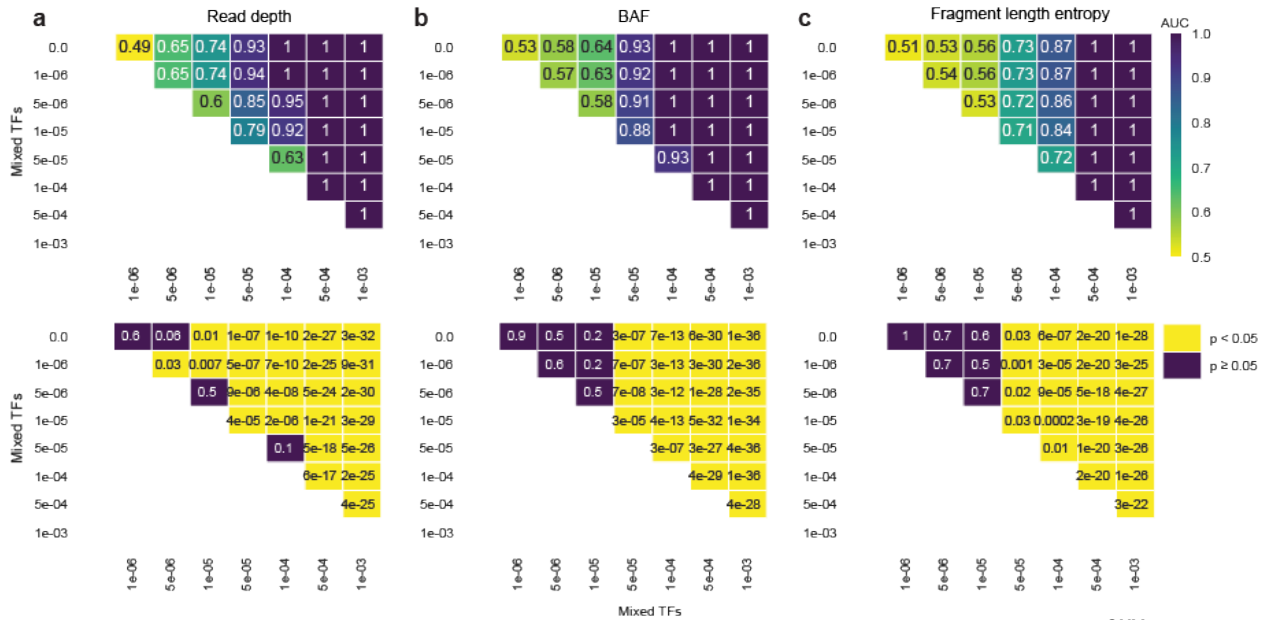

201  
202

**Supplementary Figure 3: Discriminating *in silico* mix fractions with MRD-EDGE<sup>CNV</sup>**

203 *In silico* studies of cfDNA from the metastatic colorectal cancer sample CRC-930 mixed into  
 204 cfDNA from a healthy plasma sample (CTRL-443) at mixing fractions TF = 10<sup>-6</sup>–10<sup>-3</sup> at 29X  
 205 coverage depth, performed in 25 technical replicates with independent sampling seeds for read  
 206 depth (a), BAF (b), and fragment length entropy (c) classifiers. Top) An AUC heatmap  
 207 benchmarks discrimination between different mixed TFs. Bottom) A P-value heatmap  
 208 benchmarks significant differences between read depth, BAF, and fragment length entropy signal  
 209 at different mixed TFs (two-sided Student’s t-test).

210

211

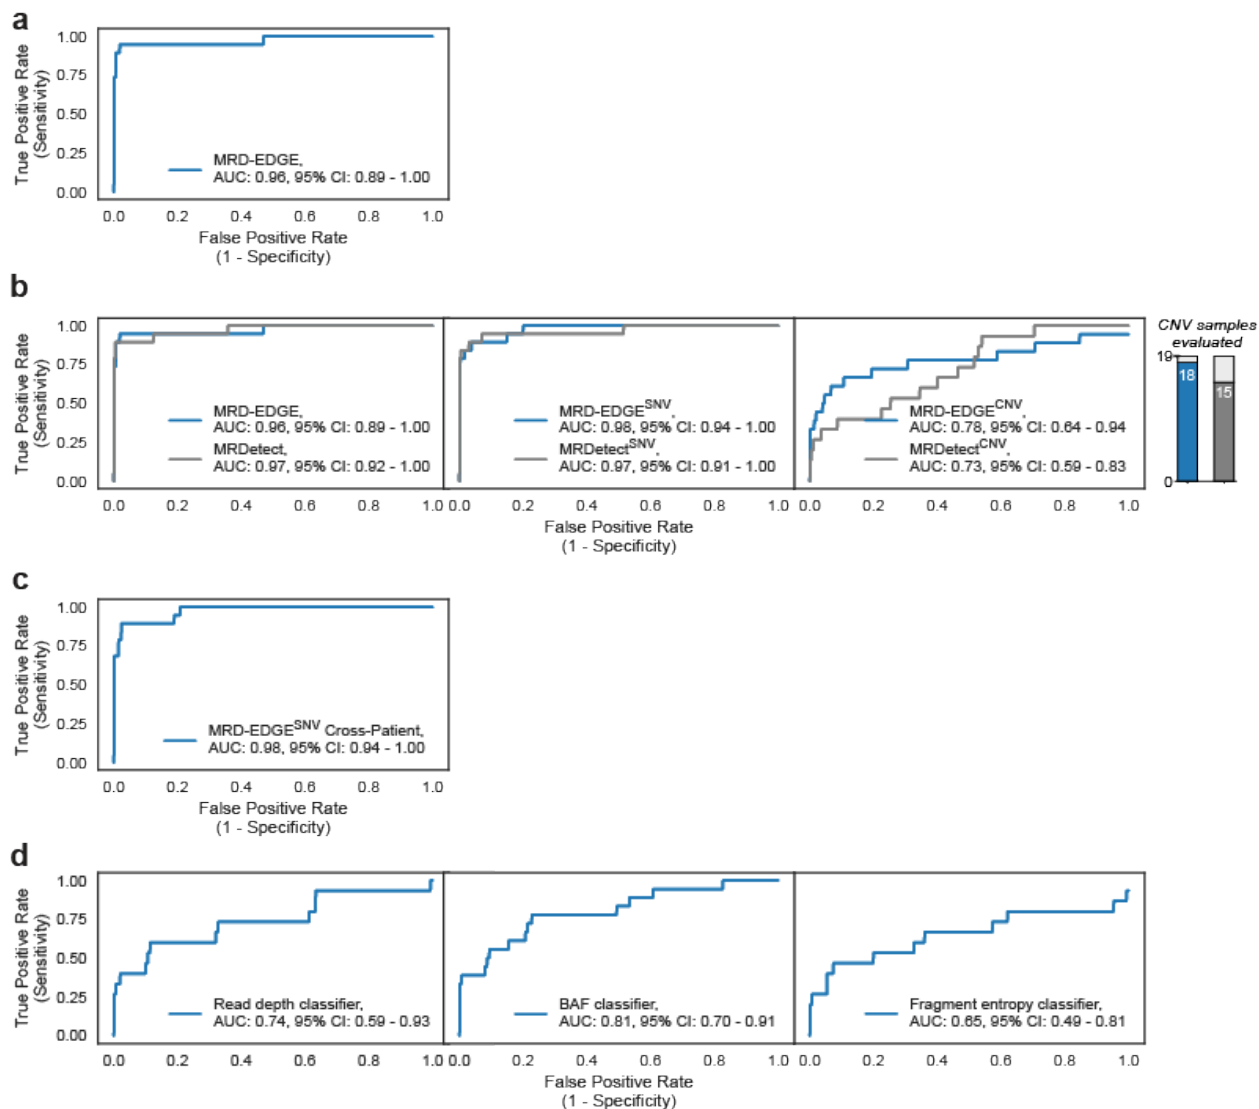

213

214 **Supplementary Figure 4: MRD-EDGE preoperative performance in colorectal cancer**  
 215 **plasma sequenced with Illumina HiSeq X (HiSeq CRC cohort)**

216 **a)** ROC analysis on MRD-EDGE (combined detection model of SNV and CNV mutations) in  
 217 pretreatment early-stage colorectal cancer. Preoperative plasma samples with matched tumor  
 218 mutation profiles ( $n=19$ , Supplementary Table 5) are compared with control plasma samples  
 219 assessed against all unmatched HiSeq CRC tumor mutation profile ( $n=15$  tumor profiles assessed  
 220 across 10 control samples from HiSeq controls cohort,  $n=190$  control-comparisons). Twenty-eight  
 221 control samples used in the HiSeq read depth panel of normals were withheld from downstream  
 222 analysis. **b)** (left) ROC analysis for MRD-EDGE (blue) as detailed in (a) and MRDetect (gray), a

223 composite of MRDetect<sup>SNV</sup> and MRDetect<sup>CNV</sup>. For MRDetect, preoperative plasma samples with  
224 matched tumor mutation profiles ( $n=19$ , Supplementary Table 5) are compared against control  
225 plasma samples assessed against all unmatched HiSeq CRC tumor mutation profile ( $n=19$  tumor  
226 profiles assessed against 29 controls from HiSeq controls,  $n=551$  comparisons). Nine control  
227 samples used in the MRDetect<sup>CNV</sup> panel of normals were withheld from downstream analysis  
228 (Supplementary Table 14). (middle) ROC analysis on preoperative HiSeq colorectal SNVs for  
229 MRD-EDGE<sup>SNV</sup> (blue) and MRDetect<sup>SNV</sup> (gray). Preoperative plasma samples with matched tumor  
230 mutation profiles ( $n=19$ , Supplementary Table 5) are compared with control plasma samples  
231 assessed against all unmatched HiSeq CRC tumor mutation profiles (for MRD-EDGE, 19  
232 mutation profiles assessed across 38 control samples for  $n=722$  control-comparisons; for  
233 MRDetect, 19 mutation profiles assessed across 29 control samples for  $n=551$  control-  
234 comparisons). (right) ROC analysis on preoperative colorectal CNVs for MRD-EDGE<sup>CNV</sup> (blue)  
235 and MRDetect<sup>CNV</sup> (gray). Preoperative plasma samples ( $n=18$  for MRD-EDGE<sup>CNV</sup> with 1 sample  
236 excluded due to insufficient aneuploidy;  $n=15$  for MRDetect, 4 samples excluded due to  
237 insufficient aneuploidy) with matched tumor mutation profiles are compared with control plasma  
238 samples assessed against all HiSeq CRC tumor mutation profiles ( $n=18$  tumor profiles assessed  
239 across 10 control samples from HiSeq controls cohort,  $n=180$  control-comparisons). Twenty-eight  
240 samples from HiSeq controls included in the read depth classifier panel of normal samples were  
241 held out from the MRD-EDGE<sup>CNV</sup> ROC analysis. **c)** Cross-patient ROC analysis on HiSeq CRC  
242 plasma samples demonstrates similar performance to control (non-cancer) plasma ROC analysis.  
243 Preoperative plasma samples ( $n=19$ ) with matched tumor mutation profiles are compared with  
244 HiSeq CRC plasma samples assessed against all unmatched HiSeq CRC tumor profiles ( $n=19$   
245 tumor profiles assessed across 18 cross-patient samples,  $n=342$  cross-comparisons) **d)** ROC  
246 analysis performed on CNV-based Z-score values for read depth (left), BAF (middle), and  
247 fragment length entropy (right) CNV classifiers in preoperative HiSeq CRC. Preoperative plasma  
248 samples with matched tumor profiles ( $n=15$  for read depth and fragment length entropy,  $n=18$  for  
249 BAF) are compared with control plasma samples assessed against all unmatched tumor profiles  
250 ( $n=150$  comparisons for read depth, 15 tumor profiles assessed across 10 control samples;  $n=684$   
251 comparisons for BAF, 18 mutation profiles assessed across 38 control samples;  $n=570$   
252 comparisons for fragment length entropy, 15 tumor profiles assessed across 38 control samples).  
253 Twenty-eight control samples included in the read depth panel of normal samples were withheld  
254 from read-depth analysis.

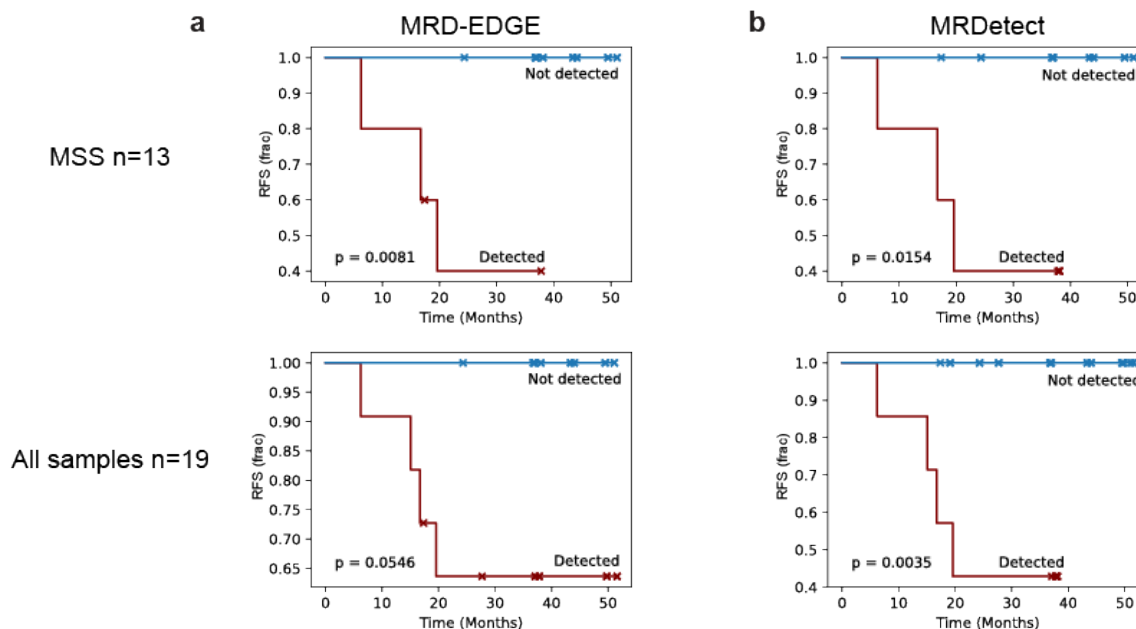

256

### 257 **Supplementary Fig. 5: Postoperative MRD detection in HiSeq CRC**

258 **a)** (top) Kaplan–Meier disease-free survival analysis was performed for MRD-EDGE across  
 259 patients with detected ( $n=5$ ) and non-detected ( $n=8$ ) postoperative ctDNA in MSS HiSeq  
 260 colorectal samples ( $n=13$ ). Postoperative ctDNA detection was associated with shorter  
 261 recurrence-free survival (two-sided log-rank test). (bottom) Survival analysis was performed on  
 262 all HiSeq CRC patients ( $n=6$  patients with MSI tumors and  $n=13$  patients with MSS tumors) with  
 263 detected ( $n=11$ ) and non-detected ( $n=8$ ) postoperative ctDNA. Association between  
 264 postoperative ctDNA detection and shorter recurrence-free survival was not statistically significant  
 265 ( $P=0.0546$ , two-sided log-rank test). **b)** The same survival analyses were performed with  
 266 MRDetect per published results<sup>14</sup> including one sample that recurred in subsequent follow up.  
 267 (top) Survival analysis was performed on patients with detected ( $n=5$ ) and non-detected ( $n=8$ )  
 268 postoperative ctDNA in MSS HiSeq colorectal samples ( $n=13$ ). Postoperative ctDNA detection  
 269 was associated with shorter recurrence-free survival (two-sided log-rank test). (bottom) Survival  
 270 analysis was performed on all patients ( $n=19$ ) with detected ( $n=7$ ) and non-detected ( $n=12$ )  
 271 postoperative ctDNA. Postoperative ctDNA detection was associated with shorter recurrence-free  
 272 survival (two-sided log-rank test). Adjustments were not made for multiple comparisons. MSS,  
 273 microsatellite stable. MSI, microsatellite instability.

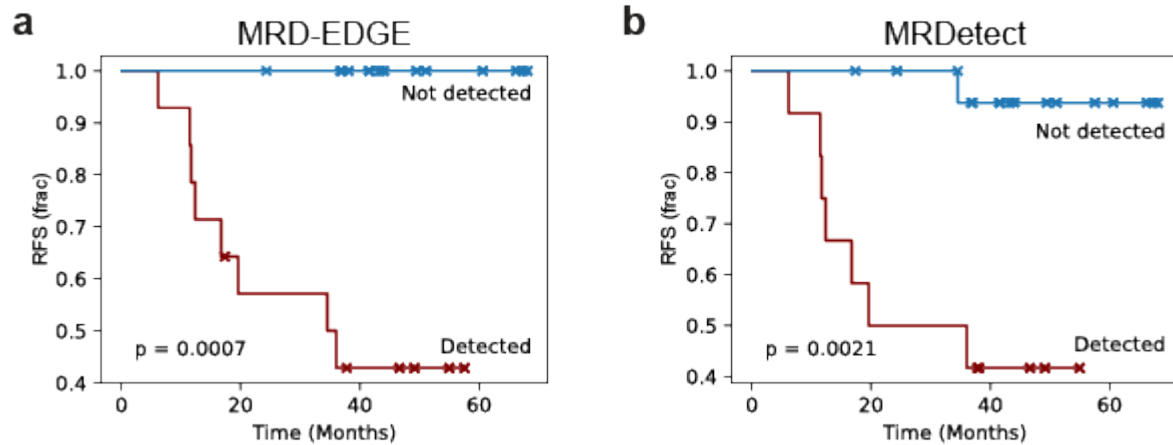

275

276 **Supplementary Fig. 6: Postoperative MRD detection in combined CRC and stage III CRC**  
 277 **cohorts**

278 a) Kaplan–Meier disease-free survival analysis for MRD-EDGE in combined HiSeq CRC and  
 279 NovaSeq stage III CRC cohorts was performed over all patients with MSS tumors with detected  
 280 ( $n=14$ ) and non-detected ( $n=14$ ) postoperative ctDNA. b) Kaplan–Meier disease-free survival  
 281 analysis for MRDetect in the same patients was performed over patients with detected ( $n=12$ ) and  
 282 non-detected ( $n=16$ ) postoperative ctDNA. Postoperative ctDNA detection was associated with  
 283 shorter recurrence-free survival (two-sided log-rank test) for both platforms. MSS, microsatellite  
 284 stable.

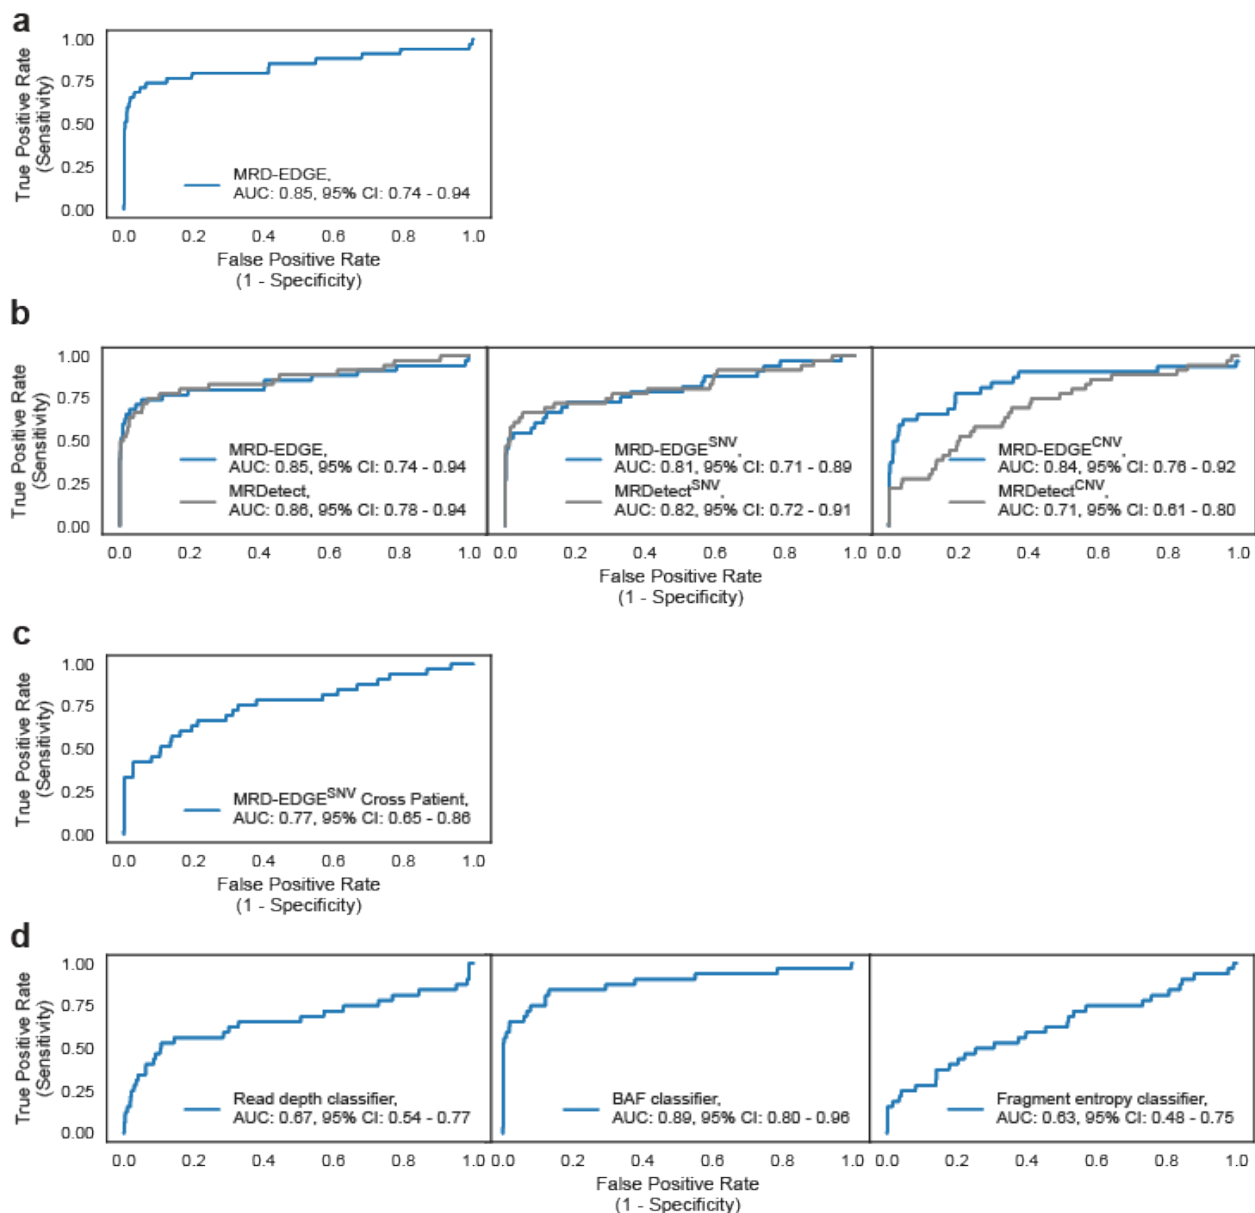

286

287 **Supplementary Fig. 7: Re-analysis of HiSeq NSCLC data with MRD-EDGE**

288 **a)** ROC analysis on MRD-EDGE (combined detection model of SNV and CNV mutations) in  
 289 pretreatment early-stage NSCLC. Preoperative plasma samples with matched tumor mutation  
 290 profiles ( $n=35$ , Supplementary Table 5) are compared with control plasma samples assessed  
 291 against all unmatched HiSeq CRC tumor mutation profile ( $n=15$  tumor profiles assessed across  
 292 10 control samples from HiSeq controls cohort,  $n=350$  control-comparisons). Twenty-eight control  
 293 samples used in the HiSeq read depth panel of normals were withheld from downstream analysis.



294 **b)** (left) ROC analysis for MRD-EDGE (blue) as detailed in (a) and MRDetect (gray), a composite  
295 of MRDetect<sup>SNV</sup> and MRDetect<sup>CNV</sup>. For MRDetect, preoperative plasma samples with matched  
296 tumor mutation profiles ( $n=35$ , Supplementary Table 5) are compared against control plasma  
297 samples assessed against all unmatched HiSeq NSCLC tumor mutation profile ( $n=36$  tumor  
298 profiles assessed against 29 controls from HiSeq controls,  $n=1,044$  comparisons). Nine control  
299 samples used in the MRDetect<sup>CNV</sup> panel of normals were withheld from downstream analysis.  
300 (middle) ROC analysis on preoperative HiSeq NSCLC SNV mutation profiles for MRD-EDGE<sup>SNV</sup>  
301 (blue) and the MRDetect<sup>SNV</sup> SVM (gray). Preoperative plasma samples with matched  
302 tumor mutation profiles ( $n=33$  for MRD-EDGE<sup>SNV</sup>, 3 samples were excluded due to an absence  
303 of high-confidence SNVs in tumor tissue due to low tumor purity;  $n=36$  for MRDetect) are  
304 compared with control plasma samples assessed against all unmatched HiSeq NSCLC tumor  
305 mutation profiles (for MRD-EDGE<sup>SNV</sup>; 33 mutation profiles assessed across 38 HiSeq control  
306 samples,  $n=1,254$  comparisons; for MRDetect<sup>SNV</sup> SVM; 36 mutation profiles assessed across 29  
307 HiSeq control samples,  $n=1,044$  comparisons). For MRDetect, 9 controls used to train the  
308 MRDetect<sup>CNV</sup> CNA panel of normals were excluded from downstream analysis. (right) ROC  
309 analysis on preoperative NSCLC CNVs for MRD-EDGE<sup>CNV</sup> (blue) and MRDetect<sup>CNV</sup> CNA (gray).  
310 Preoperative plasma samples with matched tumor mutation profiles ( $n=32$  for MRD-EDGE<sup>CNV</sup>; 2  
311 samples were excluded due to insufficient aneuploidy and 2 samples were excluded due to the  
312 absence of a matched normal sample;  $n=36$  for MRDetect) are compared with control plasma  
313 samples assessed against all unmatched HiSeq NSCLC tumor mutation profiles. Twenty-eight  
314 samples from HiSeq controls included in the read depth classifier panel of normal samples were  
315 held out from the CNV ROC analysis. **c)** Cross-patient ROC analysis on HiSeq NSCLC plasma  
316 samples demonstrates similar performance to control (non-cancer) plasma ROC analysis.  
317 Preoperative plasma samples ( $n=33$ ) with matched tumor mutation profiles are compared with  
318 HiSeq NSCLC plasma samples assessed against all unmatched HiSeq NSCLC tumor profiles (33  
319 mutation profiles assessed across 35 cross-patient samples,  $n=1,260$  cross-comparisons). **d)**  
320 ROC analysis performed on CNV-based Z-score values for read depth (left), BAF (middle), and  
321 fragment length entropy (right) CNV classifiers in preoperative HiSeq NSCLC. Preoperative  
322 plasma samples with matched tumor profiles ( $n=32$ ) are compared with control plasma samples  
323 assessed against all unmatched tumor profiles ( $n=320$  comparisons for read depth, 32 tumor  
324 profiles assessed across 10 control samples;  $n=1,216$  comparisons for BAF and fragment length  
325 entropy, 32 mutation profiles assessed across 38 control samples). Twenty-eight control samples  
326 included in the read depth panel of normal samples were withheld from read-depth analysis.

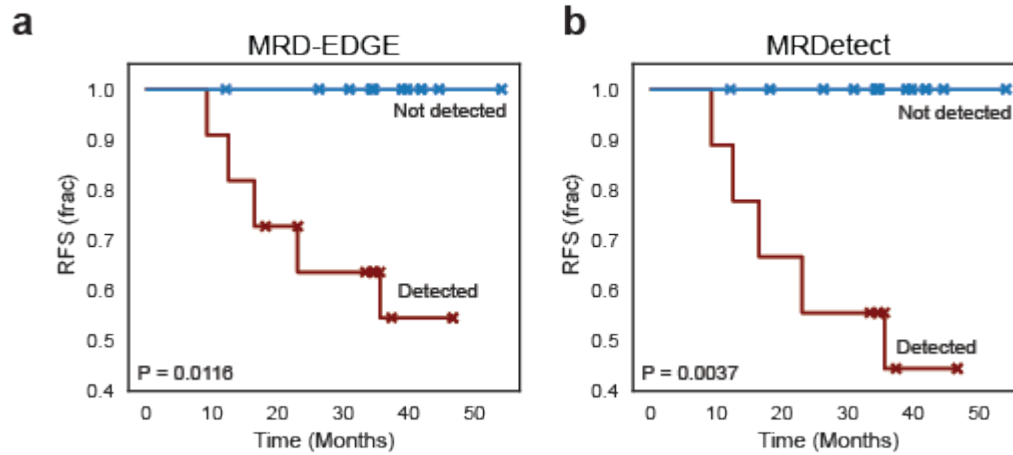

328

329 **Supplementary Fig. 8: Re-analysis of previous NSCLC data accounting for updated results**  
 330 **with MRD-EDGE.**

331 Kaplan–Meier disease-free survival analysis was performed over all patients with detected and  
 332 non-detected postoperative ctDNA for MRD-EDGE (**a**) and MRDetect (**b**). Postoperative ctDNA  
 333 detection showed association with shorter recurrence-free survival (two-sided log-rank test) for  
 334 both platforms. Results were updated to account for one additional recurrence in extended follow  
 335 up. This sample (NSCLC-111, Supplementary Table 6) was detected by both MRD-EDGE and  
 336 MRDetect.

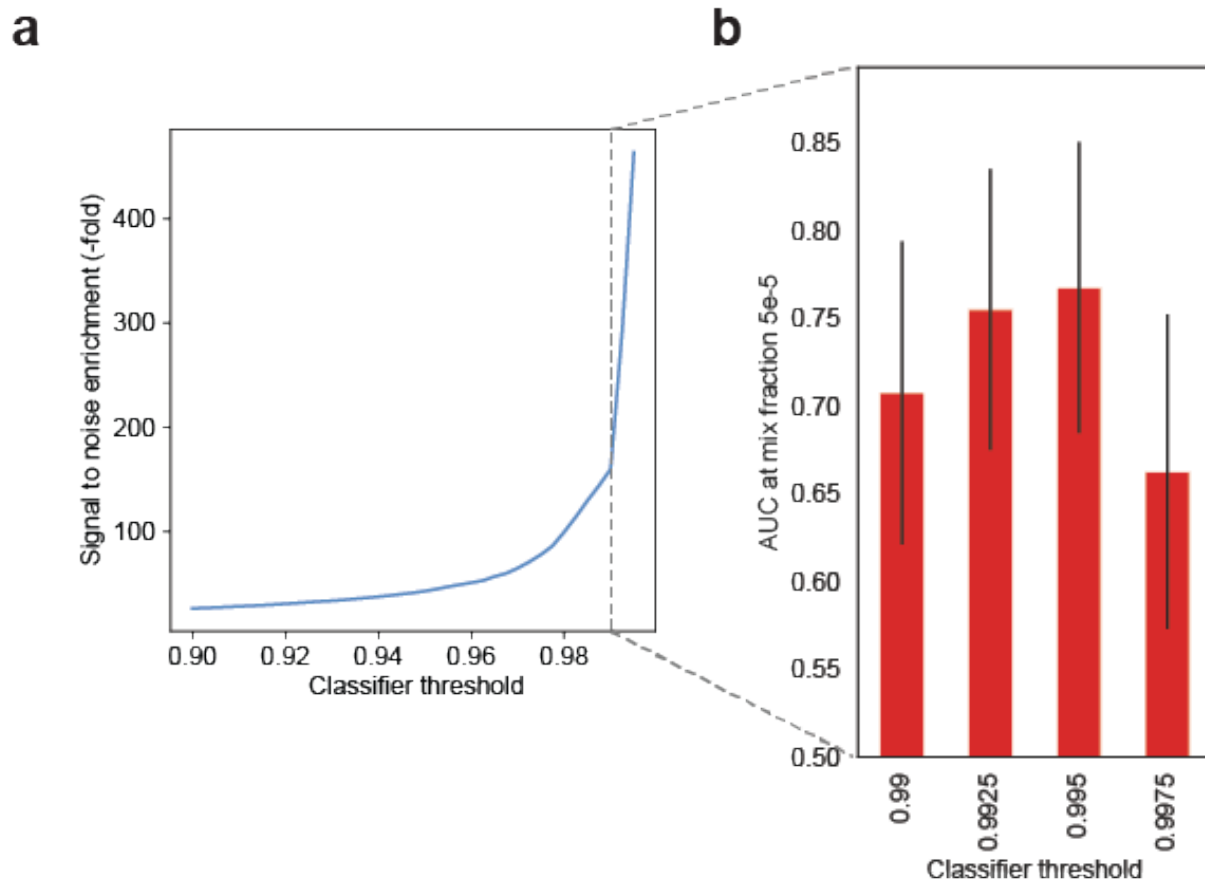

338

339 **Supplementary Fig. 9: Determination of MRD-EDGE *de novo* mutation calling classification**  
 340 **threshold**

341 **a)** Fragment-level signal-to-noise enrichment, defined as the fraction of remaining ctDNA  
 342 fragments (signal) over remaining cfDNA SNV artifacts (noise), for different MRD-EDGE<sup>dnSNV</sup>  
 343 classification thresholds in the melanoma held-out validation set derived from tumor-confirmed  
 344 ctDNA SNVs from the melanoma patient MEL-100 and post-quality filtered cfDNA artifacts from  
 345 healthy control plasma (Supplementary Table 1). The MRD-EDGE<sup>SNV</sup> deep learning classifier  
 346 uses a sigmoid activation function that outputs the likelihood between 0 and 1 that a candidate  
 347 SNV fragment is a mutated ctDNA fragment or cfDNA harboring a sequencing error, and the  
 348 classification threshold is used as a decision boundary for these two classes. Signal-to-noise  
 349 enrichment increases at higher classification thresholds, as expected. **b)** As increased specificity  
 350 will ultimately eliminate most of the signal, to choose an optimal threshold for classification, we

351 compared sensitivity vs. TF=0 in an *in silico* study of cfDNA from the metastatic melanoma sample  
352 MEL-100 mixed in  $n=20$  replicates against cfDNA from a healthy plasma sample (TF=0) at  $5 \cdot 10^{-5}$   
353 <sup>5</sup> at 16X coverage depth. We found optimal performance at a classifier threshold of 0.995 as  
354 measured by AUC of mixed replicates against TF=0. This threshold was subsequently applied in  
355 *de novo* mutation calling analyses. Error bars indicate DeLong AUC variance.

356

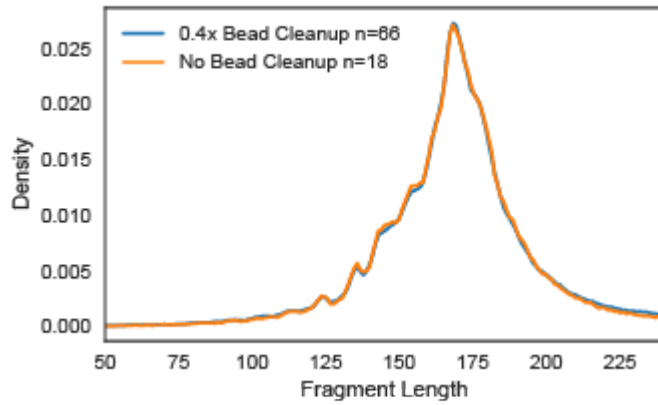

357

358 **Supplementary Fig. 10: Fragment size distribution for melanoma samples +/- bead cleanup**

359 Fragment size distribution for melanoma samples that did and did not undergo bead cleanup. A  
360 subset of melanoma plasma samples (blue,  $n=66$ ) stored in an immunotherapy biobank  
361 underwent 0.4x magnetic bead cleanup to remove contamination. No differences were seen in  
362 fragment length distribution compared to samples from the same cohort that did not undergo  
363 cleanup (orange,  $n=18$ ). Fragment size was estimated from paired-end sequencing.

364

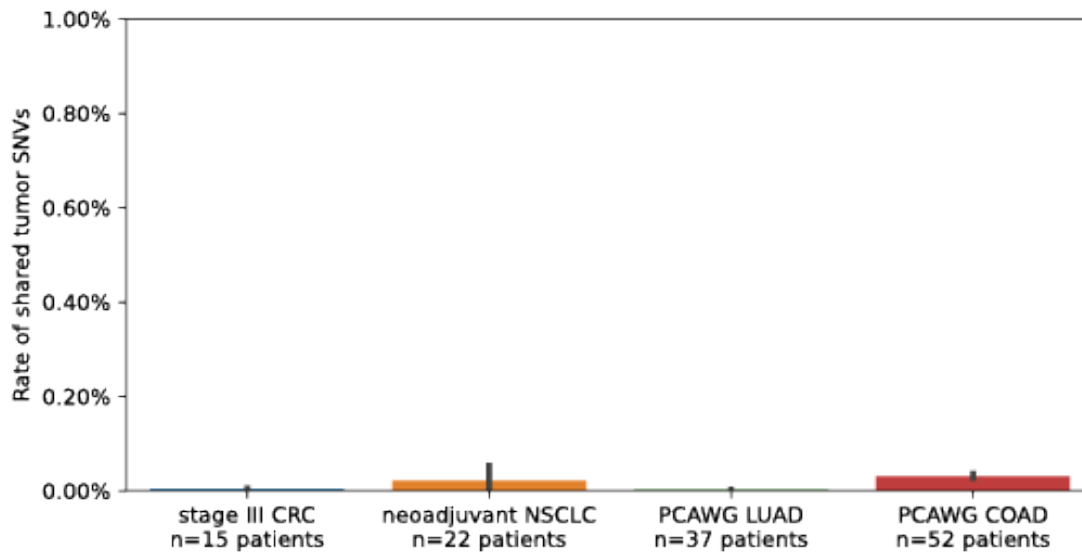366  
367**Supplementary Figure 11: Rate of shared SNVs between WGS tumor samples.**

368 Rate of shared tumor SNVs between any 2 samples in 4 WGS cohorts: stage III CRC ( $n=15$ )  
369 patients, median rate=0, mean= $4 \times 10^{-5}$ ), neoadjuvant NSCLC ( $n=22$ , 0,  $2 \times 10^{-4}$ ), PCAWG LUAD  
370 cohort ( $n=37$ , 0,  $2 \times 10^{-5}$ ), and PCAWG COAD ( $n=52$ ,  $6 \times 10^{-5}$ ,  $3 \times 10^{-3}$ ). Error bars indicate 95% CI.  
371

372

**Supplementary Fig. 12 [referenced in Methods], Widman et al.**

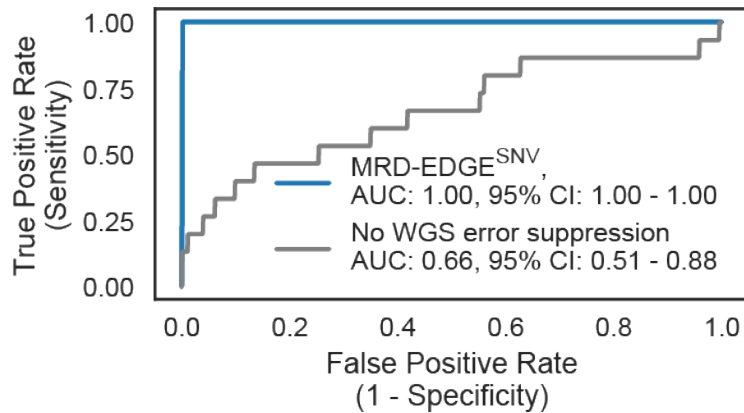

373

374 **Supplementary Figure 12: Impact of individual fragment classification on MRD-EDGE<sup>SNV</sup>**

375

**performance in preoperative stage III colorectal cancer**

376

ROC analysis with MRD-EDGE<sup>SNV</sup> (blue), and without WGS error suppression (gray) in stage III

377

CRC cohort. Preoperative plasma samples ( $n=15$ ) were used as the true label (Supplementary

378

Table 5). Control plasma samples ( $n=40$ ) from the Aarhus controls cohort assessed against all

379

stage III CRC tumor mutation profiles ( $n=15$ ) were used as the false label ( $n=600$  comparisons).

380

Five control samples included in SNV model training were withheld from this analysis

381

(Supplementary Table 14).

382

**Supplementary Fig. 13 [referenced in Methods], Widman et al.**

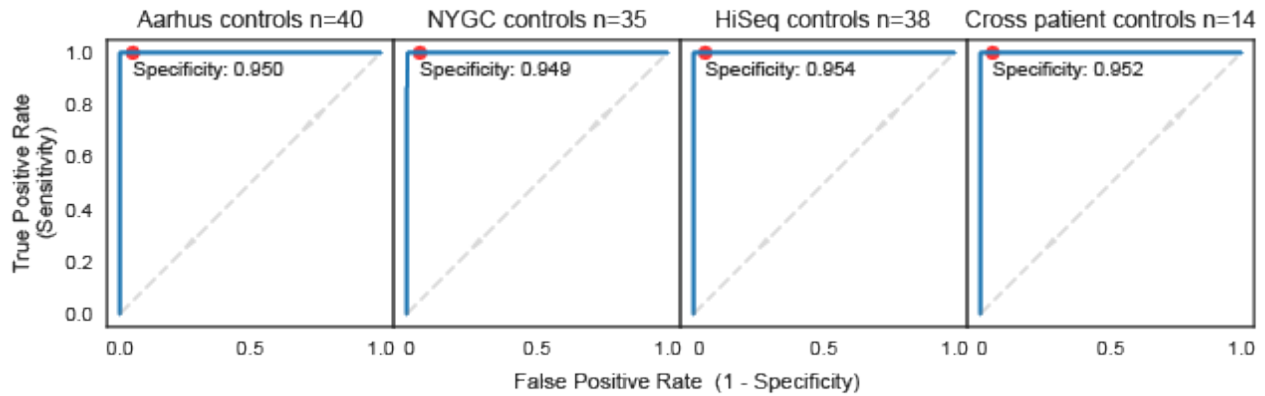

383

384 **Supplementary Fig. 13: MRD-EDGE<sup>SNV</sup> Z scores compared to 4 non-cancer control plasma**  
385 **cohorts**

386 ROC analysis on preoperative colorectal SNV mutation profiles for MRD-EDGE<sup>SNV</sup> (blue) vs.  
387 noise distributions from different sequencing centers and sequencing platforms. Preoperative  
388 stage III colorectal plasma samples (n=15) were used as the true label, and the panel of control  
389 plasma samples assessed against all stage III CRC tumor mutation profiles was used as the false  
390 label. Aarhus controls (n=40) that were sequenced at the same sequencing center (Aarhus  
391 University) and the same sequencing platform (NovaSeq) were used as the baseline noise  
392 distribution. The 95.0% specificity threshold is marked in red in the other noise distributions:  
393 NYGC controls, sequenced on Illumina NovaSeq at the New York Genome Center (94.9%  
394 specificity); HiSeq controls, sequenced on Illumina HiSeq X at the New York Genome Center  
395 (95.4% specificity); and cross-patient controls from other stage III CRC patients from the same  
396 center and sequencing platform (specificity 95.2%).



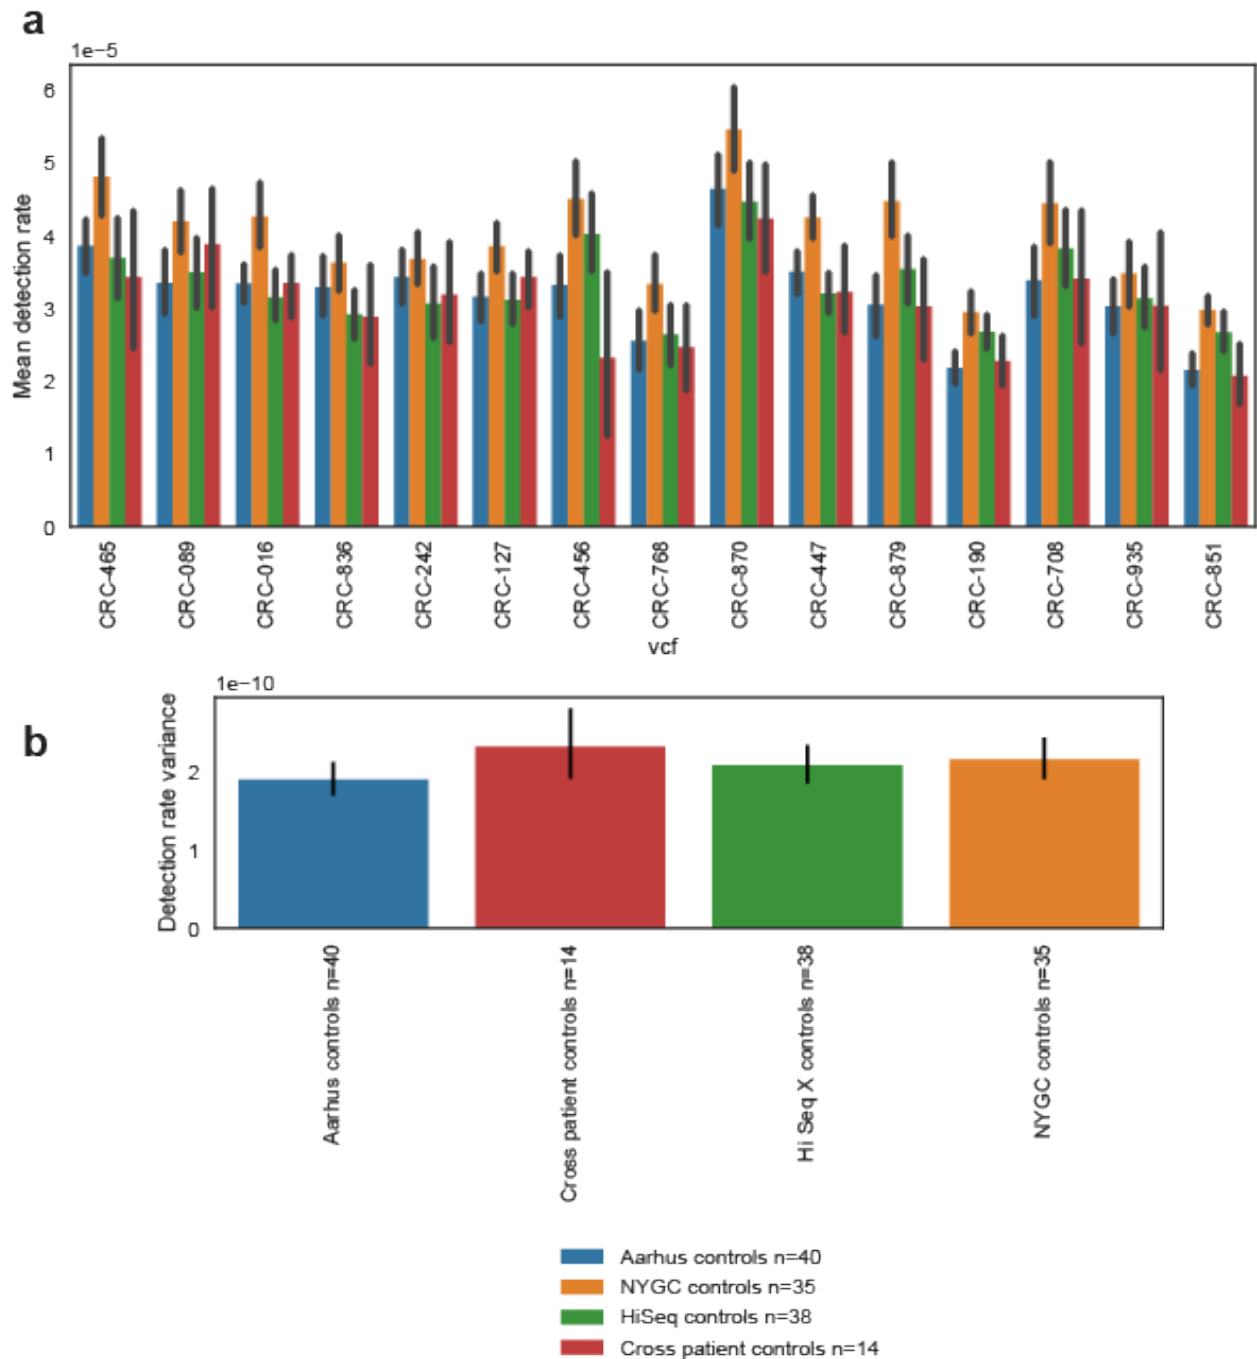

398  
399

**Supplementary Fig. 14: Mean detection rate and variance in 4 non-cancer control cohorts**

400 **a)** Side-by-side comparison of mean detection rates in non-cancer (control) noise distributions for  
 401 15 stage III CRC patient-specific SNV mutation profiles. Whiskers represent standard error for  
 402 detection rate for each control noise distribution. **b)** Detection rate variance for each control noise  
 403 distribution. Error bars indicate Bayesian 95% confidence interval for population variance.

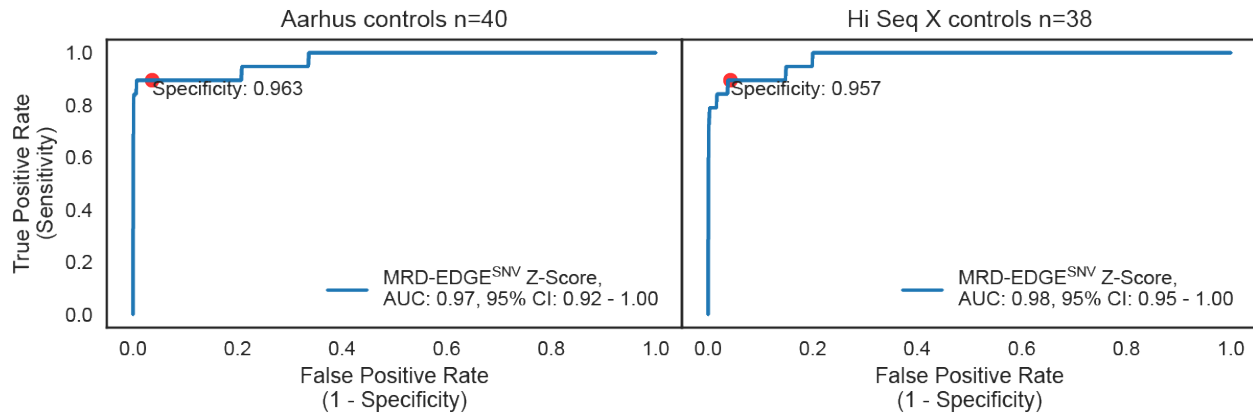

405

406

407

408

**Supplementary Figure 15: Comparison of non-cancer control plasma samples sequenced on 2 different sequencing platforms in preoperative early-stage colorectal cancer re-analysis cohort**

409

410

411

412

413

414

415

416

417

418

ROC analysis on preoperative HiSeq colorectal SNV mutation profiles for MRD-EDGE<sup>SNV</sup> (blue) vs. noise distributions from different sequencing centers and sequencing platforms. Preoperative early-stage colorectal plasma samples ( $n=19$ ) re-analyzed from prior work<sup>14</sup> were used as the true label, and the panel of control plasma samples assessed against all HiSeq CRC tumor mutation profiles was used as the false label. The Z Score ctDNA detection threshold was prespecified in the stage III CRC cohort (Fig. 3a-b). The threshold is marked in red for two noise distributions: Aarhus controls ( $n=40$ ), sequenced on Illumina NovaSeq at Aarhus University (96.3% specificity), and HiSeq controls, sequenced on Illumina HiSeq X at the New York Genome Center (95.7% specificity). Preoperative ctDNA sensitivity is 89.5% (17/19 samples detected above the threshold) when either control cohort is used as the control noise distribution.

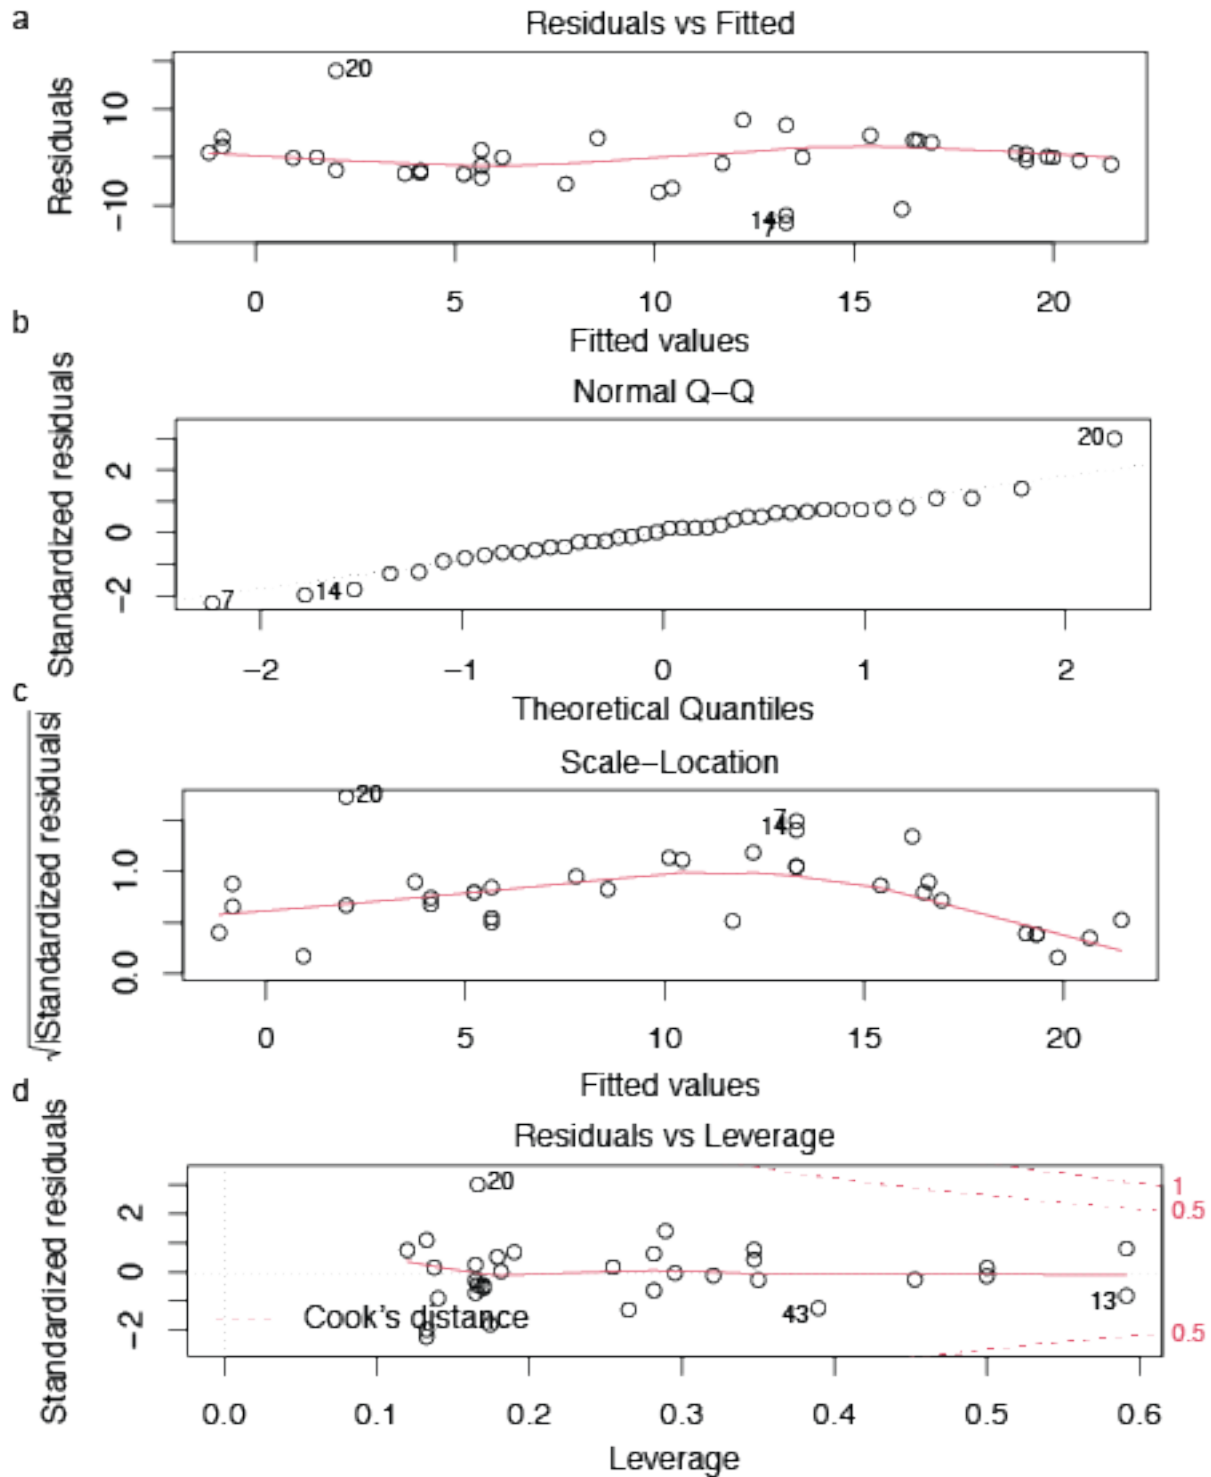

Supplementary Figure 16: ANOVA model checking plots.

422 Residuals vs. Fitted, Normal Q-Q, Scale Location, and Residuals vs. Leverage plots for two-way  
423 ANOVA for relationship between categorical variables and MRD-EDGE<sup>SNV</sup> Z score in  
424 neoadjuvant NSCLC ( $n=44$ ) cancer samples. ANOVA was performed using stats package in R  
425 to model the continuous variable MRD-EDGE<sup>SNV</sup> Z score as the dependent variable and the  
426 variables 'DNA extraction date', 'Library Preparation Data', 'Sequencing date', and 'Timepoint' as  
427 independent variables. MRD-EDGE<sup>SNV</sup> Z Scores were capped at 20 to exclude outliers. **a)**  
428 residuals vs fitted plot, x-axis is fitted values from the model (Predicted values), y-axis is residuals  
429 (Difference between observed and predicted values). **b)** normal Q-Q Plot: x-axis is theoretical  
430 quantiles from a standard normal distribution, y-axis is ordered residuals from the model  
431 (Quantiles of the residuals). **c)** scale-location plot: x-axis is fitted values from the model (Predicted  
432 values), y-axis is square root of standardized residuals. **d)** residuals vs leverage plot: x-axis is  
433 leverage values (Measure of influence of each data point on the model), y-axis is standardized  
434 residuals (Measure of how far each observed value is from the expected value). Plots were  
435 constructed from R stats package.

437 a

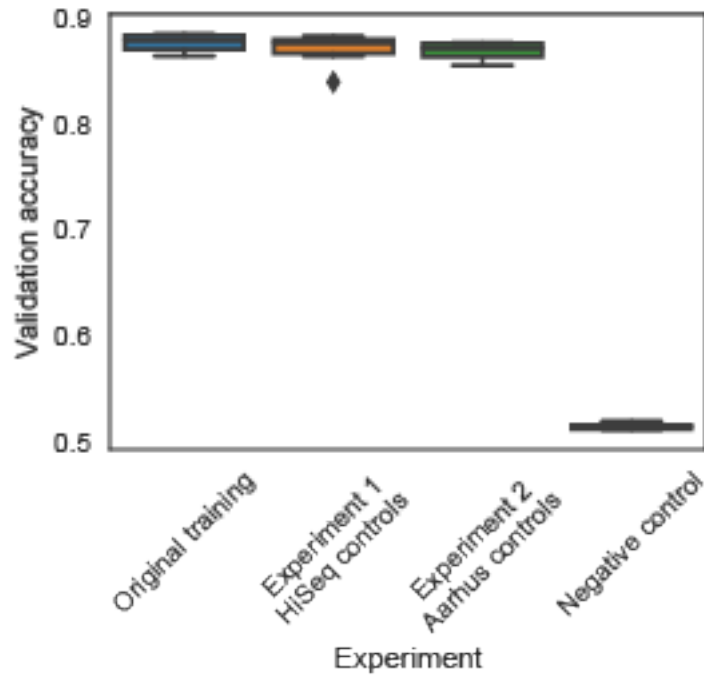438  
439

b

| Approach                                                           | Training set positive label                | Training set negative label               | Validation set positive label            | Validation set negative label             |
|--------------------------------------------------------------------|--------------------------------------------|-------------------------------------------|------------------------------------------|-------------------------------------------|
| Original training (positive and negative labels from same batch)   | NovaSeq <b>Melanoma</b> , batch 2020-08-25 | NYGC <b>controls</b> , batch 2020-08-25   | HiSeq <b>Melanoma</b> , batch 2019-05-22 | NYGC <b>controls</b> , batch 2020-08-25   |
| Experiment 1 (positive and negative labels from different batches) | NovaSeq <b>Melanoma</b> , batch 2020-08-25 | HiSeq <b>controls</b> , batch 2018-04-26  | HiSeq <b>Melanoma</b> , batch 2019-05-22 | HiSeq <b>controls</b> , batch 2018-04-26  |
| Experiment 2 (positive and negative labels from different batches) | NovaSeq <b>Melanoma</b> , batch 2020-08-25 | Aarhus <b>controls</b> , batch 2021-02-10 | HiSeq <b>Melanoma</b> , batch 2019-05-22 | Aarhus <b>controls</b> , batch 2021-02-10 |
| Negative control (positive and                                     | NovaSeq <b>Melanoma</b> ,                  | Aarhus <b>controls</b> , batch            | NYGC <b>controls</b> , batch 2020-08-25  | Aarhus <b>controls</b> , batch            |

|                                                                                                                  |                  |            |  |            |
|------------------------------------------------------------------------------------------------------------------|------------------|------------|--|------------|
| negative labels from different batches with validation using <i>only control</i> samples from different batches) | batch 2020-08-25 | 2021-02-10 |  | 2021-02-10 |
|------------------------------------------------------------------------------------------------------------------|------------------|------------|--|------------|

440  
441 **Supplementary Figure 17: Assessment of validation accuracy in 4 different melanoma**  
442 **deep learning model training set approaches.**

443 **a)** Classifiers ( $n=6$  per experiment) were trained with the same training and validation positive  
444 labels as used in our MRD-EDGE<sup>SNV</sup> melanoma classifier (Supplementary Table 1). In our original  
445 training paradigm, negative labels for training and validation were drawn from NYGC controls,  
446 which were sequenced within the same batch as our training positive label (New York Genome  
447 Center, Illumina NovaSeq, Supplementary Table 5). In Experiment 1 and Experiment 2, negative  
448 labels for validation and training were drawn from samples sequenced within different batches on  
449 different platforms (Experiment 1: HiSeq controls, Illumina HiSeq, New York Genome Center) or  
450 different sequencing centers (Experiment 2: Aarhus controls, Illumina NovaSeq, Aarhus  
451 University). As a negative control, we trained the original melanoma positive label (batch 2020-  
452 08-25) against controls from a different batch (Aarhus controls) and substituted the validation  
453 positive label with non-cancer controls from the training positive label batch (batch 2020-08-25).  
454 We observed minimal discriminatory signal in this setting. Box plots represent median, lower and  
455 upper quartiles; whiskers correspond to 1.5 x interquartile range. **b)** Color table demonstrating  
456 sequencing batches used in classifier training and validation in panel **a)**. Each color denotes a  
457 distinct sequencing batch.

458

459

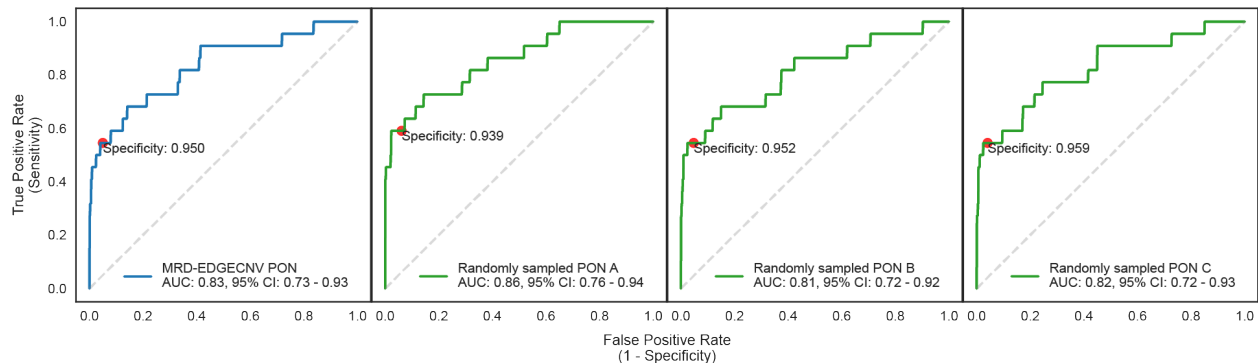

461

462

463

**Supplementary Figure 18: Comparison of read depth panel of normal samples (PONs) in pretreatment, preoperative neoadjuvant non-small cell lung cancer**

464

465

466

467

468

469

470

471

472

473

ROC analysis performed on read-depth Z-score values with 4 different PONs. Preoperative plasma samples ( $n=22$ ) were used as the true label, and the patient-specific mutation profiles assessed against unmatched plasma samples (22 mutation profiles assessed across 20 control samples) was used as the false label ( $n=440$  comparisons). Non-cancer plasma samples were randomly sampled to be in the PON or held-out from the PON. Performance in the original read-depth PON (blue) is highly generalizable compared to randomly sampled PONs in which controls were included in the PON vs. held-out of the PON. In each PON, control samples were held out of the PON and 65 samples were included in the PON. The 95.0% specificity threshold is marked in red in the randomly sampled PONs.

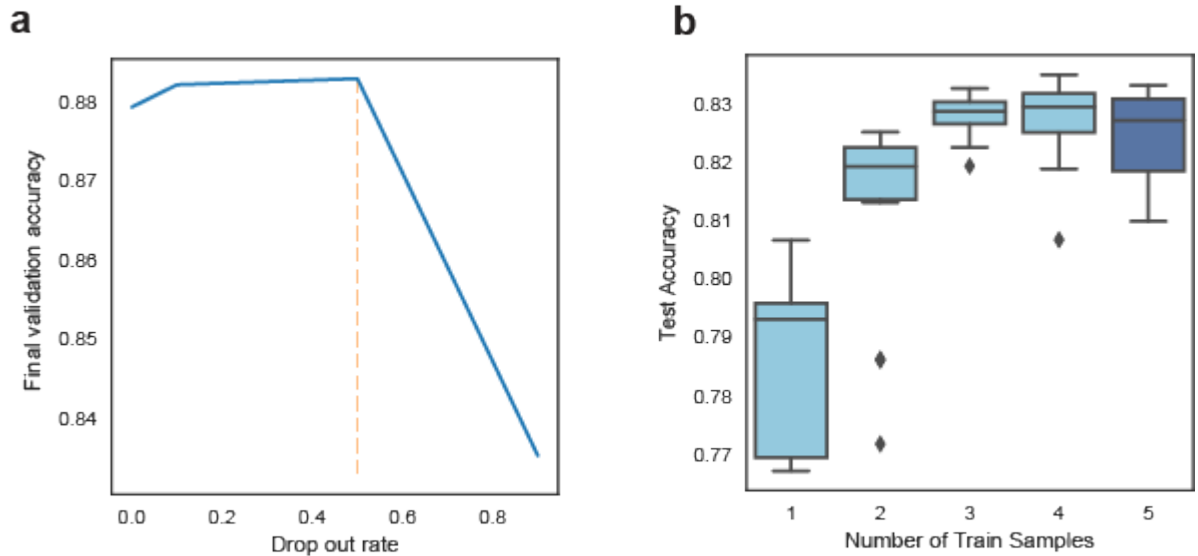

475

476 **Supplementary Fig. 19: Sparsity and random sampling with replacement analyses for**  
 477 **MRD-EDGE<sup>SNV</sup>**

478 **a)** Sparsity analysis for MRD-EDGE<sup>SNV</sup> in melanoma. Melanoma models were trained at different  
 479 dropout rates (0 to 0.9, blue line) and classification accuracy was evaluated in a held-out  
 480 cutaneous melanoma validation set (Supplementary Table 1). Our chosen dropout rate of 0.5  
 481 (yellow dashed line) produced optimal accuracy in the held-out validation set. **B)** Random  
 482 sampling with replacement for all possible combinations of training samples within the MRD-  
 483 EDGE<sup>SNV</sup> classifier. Models were trained on 1 to 5 high-burden colorectal samples against  $n=5$   
 484 controls and performance was evaluated based on fragment classification accuracy in a test set  
 485 held out from training ( $n=2$  high-burden samples and  $n=2$  non-cancer controls). The final MRD-  
 486 EDGE<sup>SNV</sup> classifier used the 5 high-burden samples with the most ctDNA fragments as the train  
 487 set. Box plots represent median, lower and upper quartiles; whiskers correspond to 1.5 x  
 488 interquartile range.

489



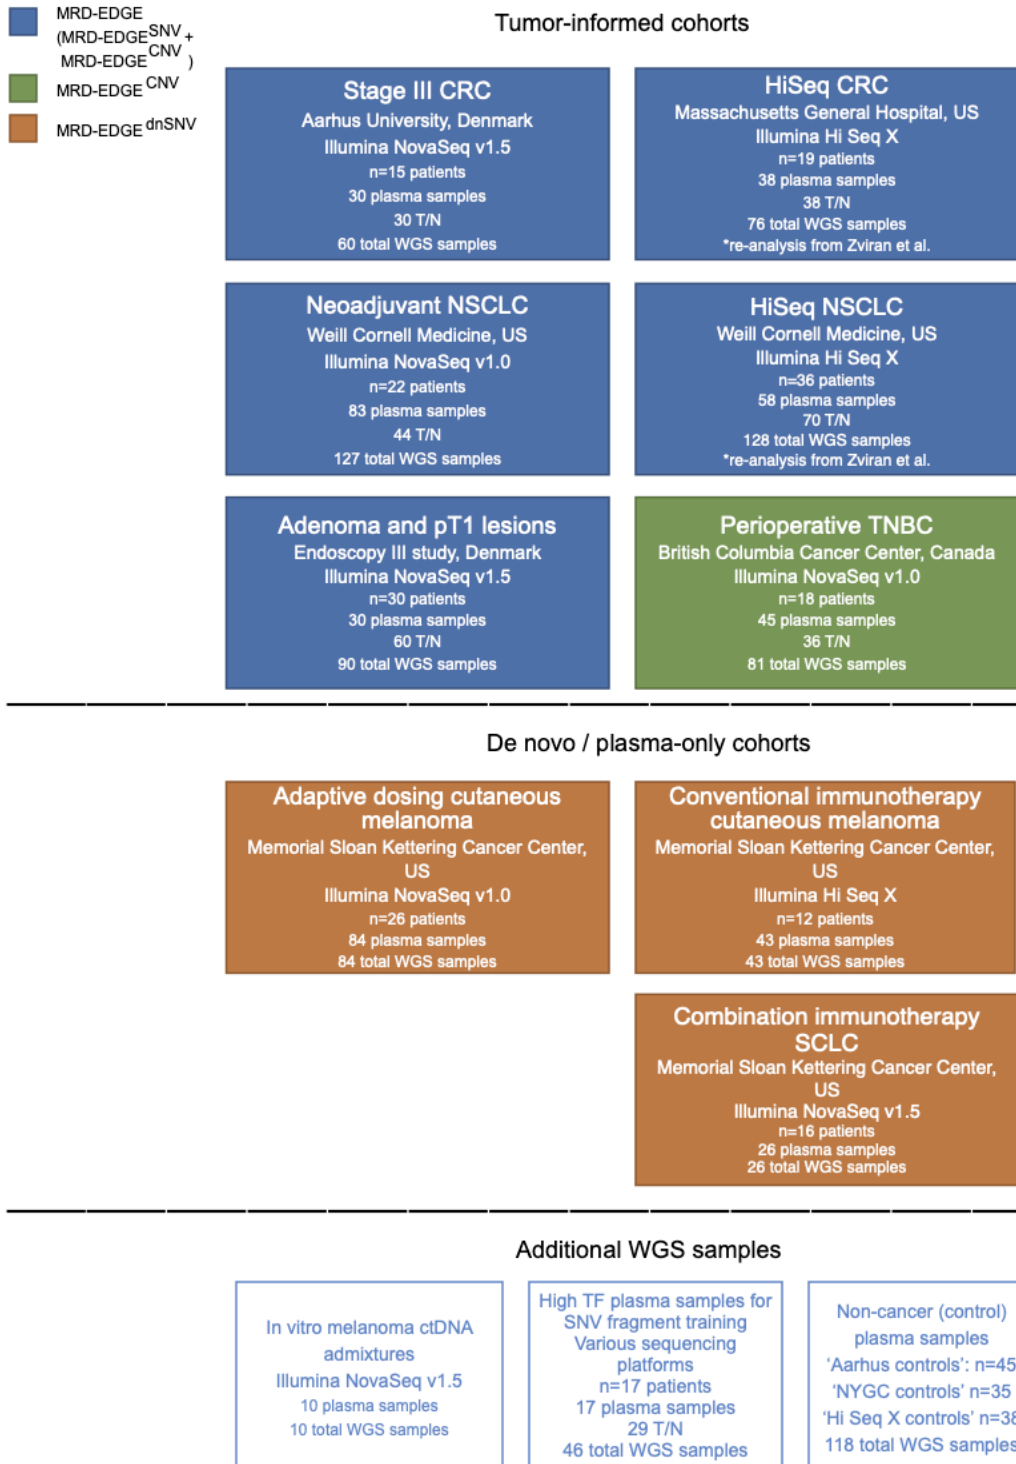

493 **Flowchart Fig. 1: Overview of plasma WGS cohorts**

494 Boxed description of clinical cohorts used throughout the study. Boxes indicate clinical context,  
495 sequencing preparation and number of WGS samples. Color indicates which MRD-EDGE  
496 workflow was applied (blue: tumor-informed MRD-EDGE, green: MRD-EDGE<sup>CNV</sup>, orange: MRD-  
497 EDGE<sup>dnSNV</sup>). T/N, tumor-normal pairs.

498

MRD-EDGE<sup>SNV</sup> fragment-level model training

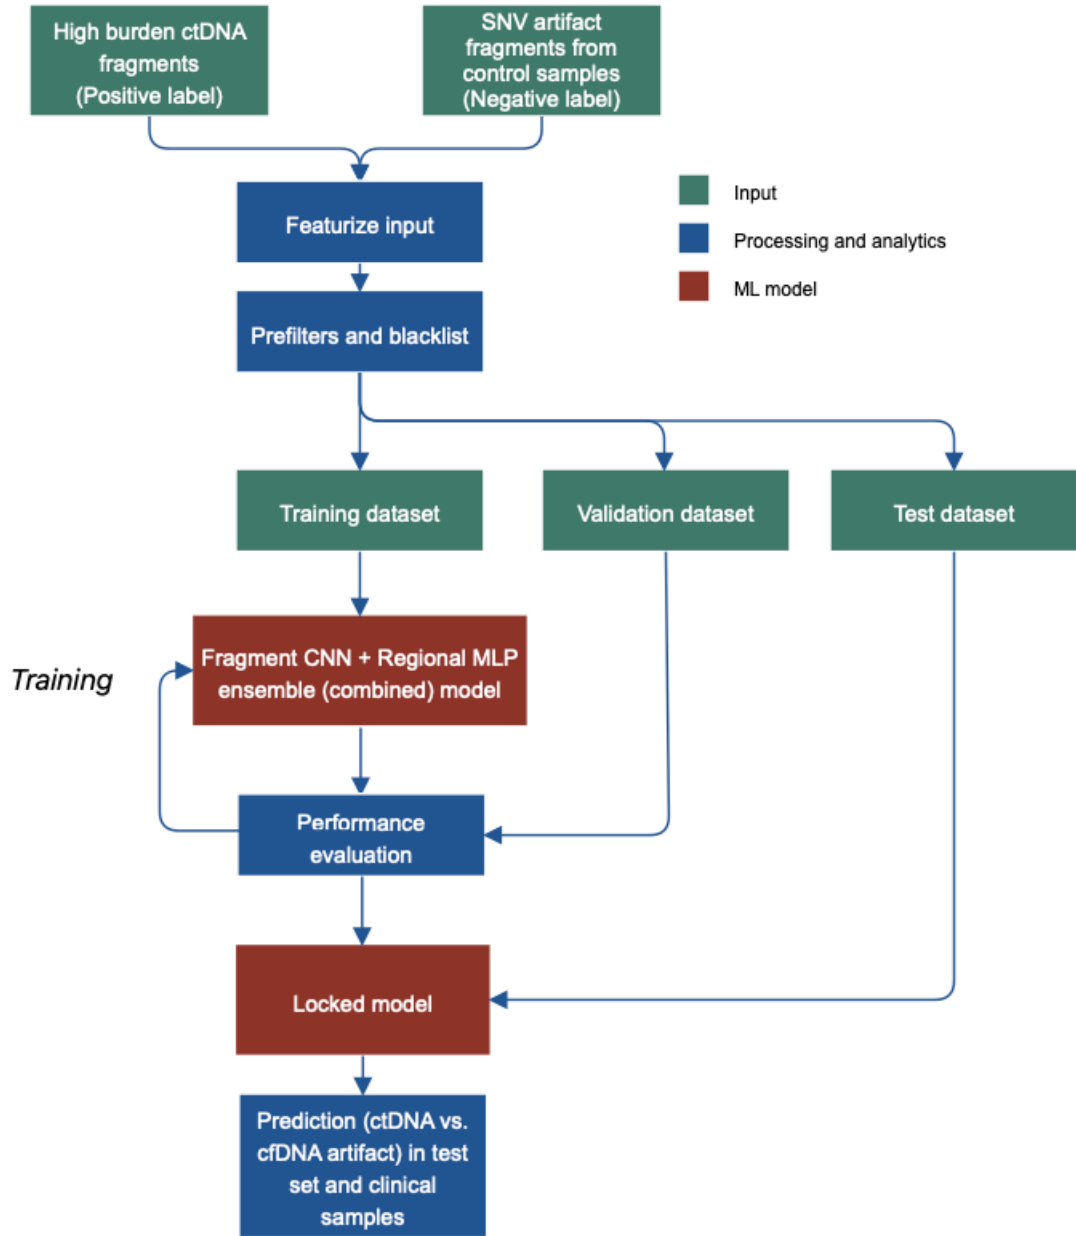

500

501 **Flowchart Fig. 2: MRD-EDGE<sup>SNV</sup> model training flowchart**

502 Disease-specific ctDNA SNV fragments (positive label) are collected from patient plasma samples

503 with high-burden metastatic disease. cfDNA SNV fragments (negative label) are sourced from

504 patient plasma samples from patients without cancer. Relevant features are extracted from  
505 genomic information and fragments are passed through our quality filters and blacklists  
506 (Methods). Data are partitioned into train, validation, and test datasets as described for each  
507 cancer type in Supplementary Table 1. The train dataset is used to train the MRD-EDGE<sup>SNV</sup>  
508 ensemble of the Fragment CNN and Regional MLP (Fig. 1d, training is performed jointly as the  
509 ensemble evaluates the latent space outputs of the fragment and regional components) to classify  
510 cancer ctDNA vs. SNV artifact. Following training, the ensemble classifier undergoes performance  
511 evaluation in a held-out validation dataset. After optimization, the model is locked and undergoes  
512 performance evaluation in a held-out test set. The final result is a disease-specific (e.g., NSCLC,  
513 cutaneous melanoma, or CRC) SNV fragment classifier that is applied to clinical samples.  
514 Supplementary Table 1 provides train, validation, and test set performance metrics.  
515

**Tumor-informed MRD-EDGE<sup>SNV</sup>  
detection analysis**

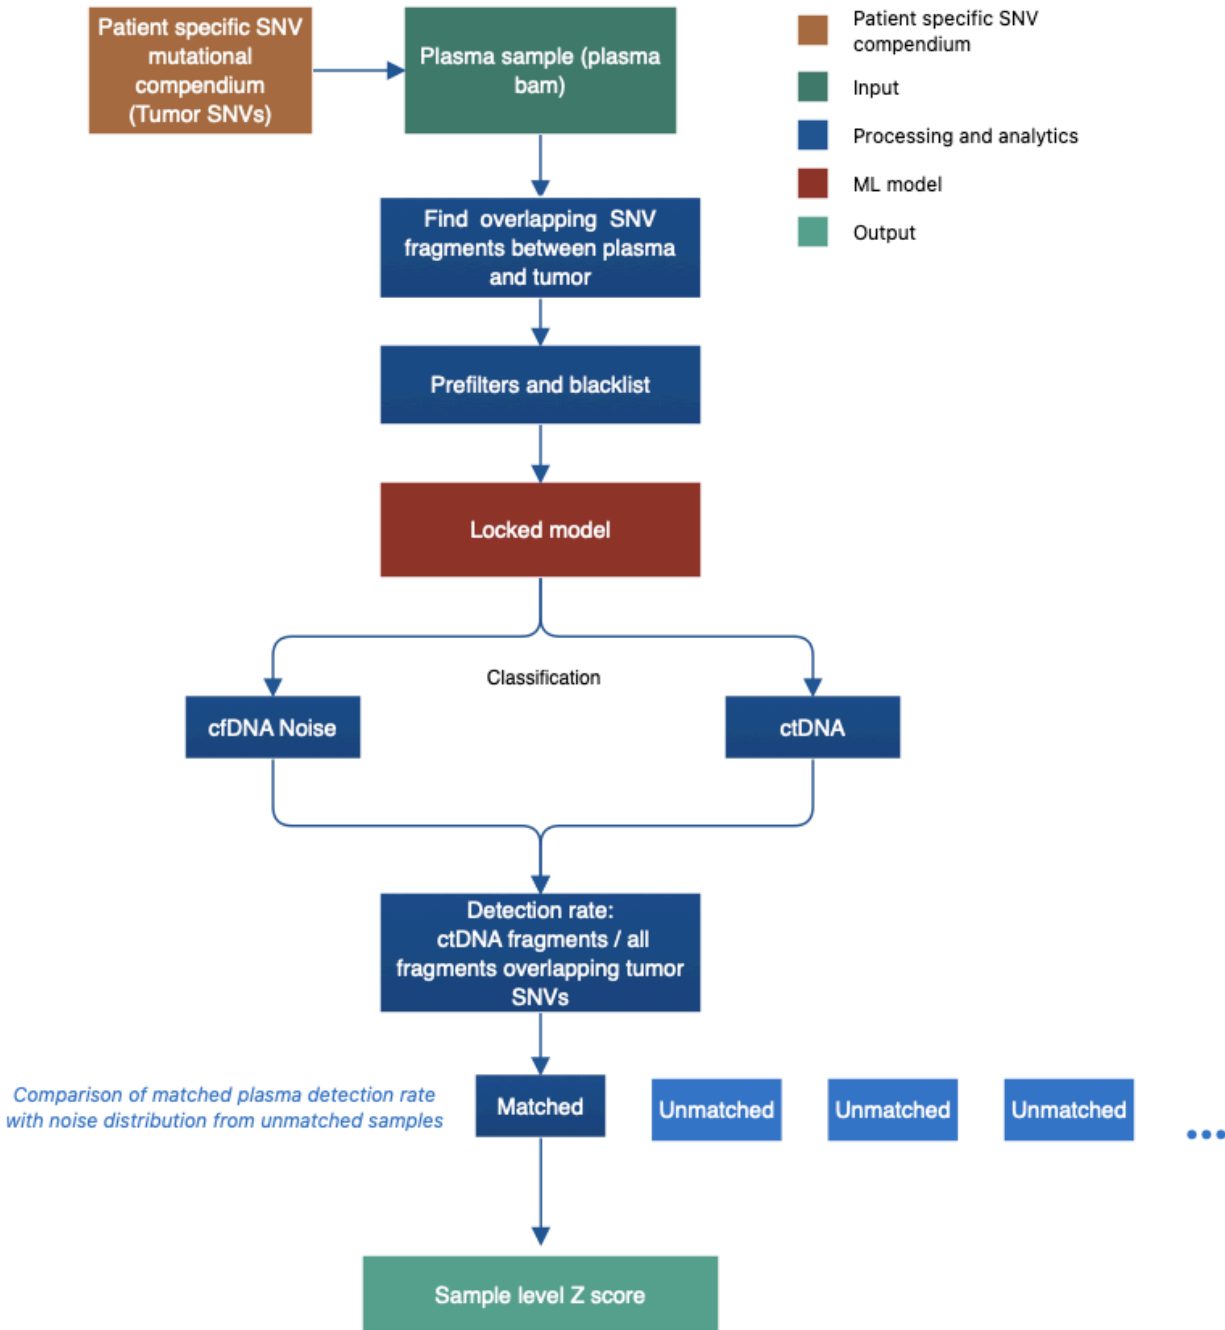

519 A patient-specific SNV profile captures SNVs in tumor tissue. Plasma at matching genetic loci is  
520 evaluated for matching SNV fragments, which are subsequently filtered by quality metrics and a  
521 recurrent SNV blacklist. A locked, disease-specific MRD-EDGE<sup>SNV</sup> model is applied to post-filter  
522 SNV fragments which are classified as ctDNA (positive classification) or cfDNA artifact (negative  
523 classification). Detection rate is measured as the number of SNV fragments classified as ctDNA  
524 divided by the total number of fragments (SNV and non-SNV) found at all tumor SNV loci. At the  
525 sample level, the patient-specific SNV profile is applied to matched and unmatched plasma  
526 samples, as the latter form a detection rate noise distribution. Output is an MRD-EDGE<sup>SNV</sup> Z score  
527 indicative of underlying ctDNA content.

528

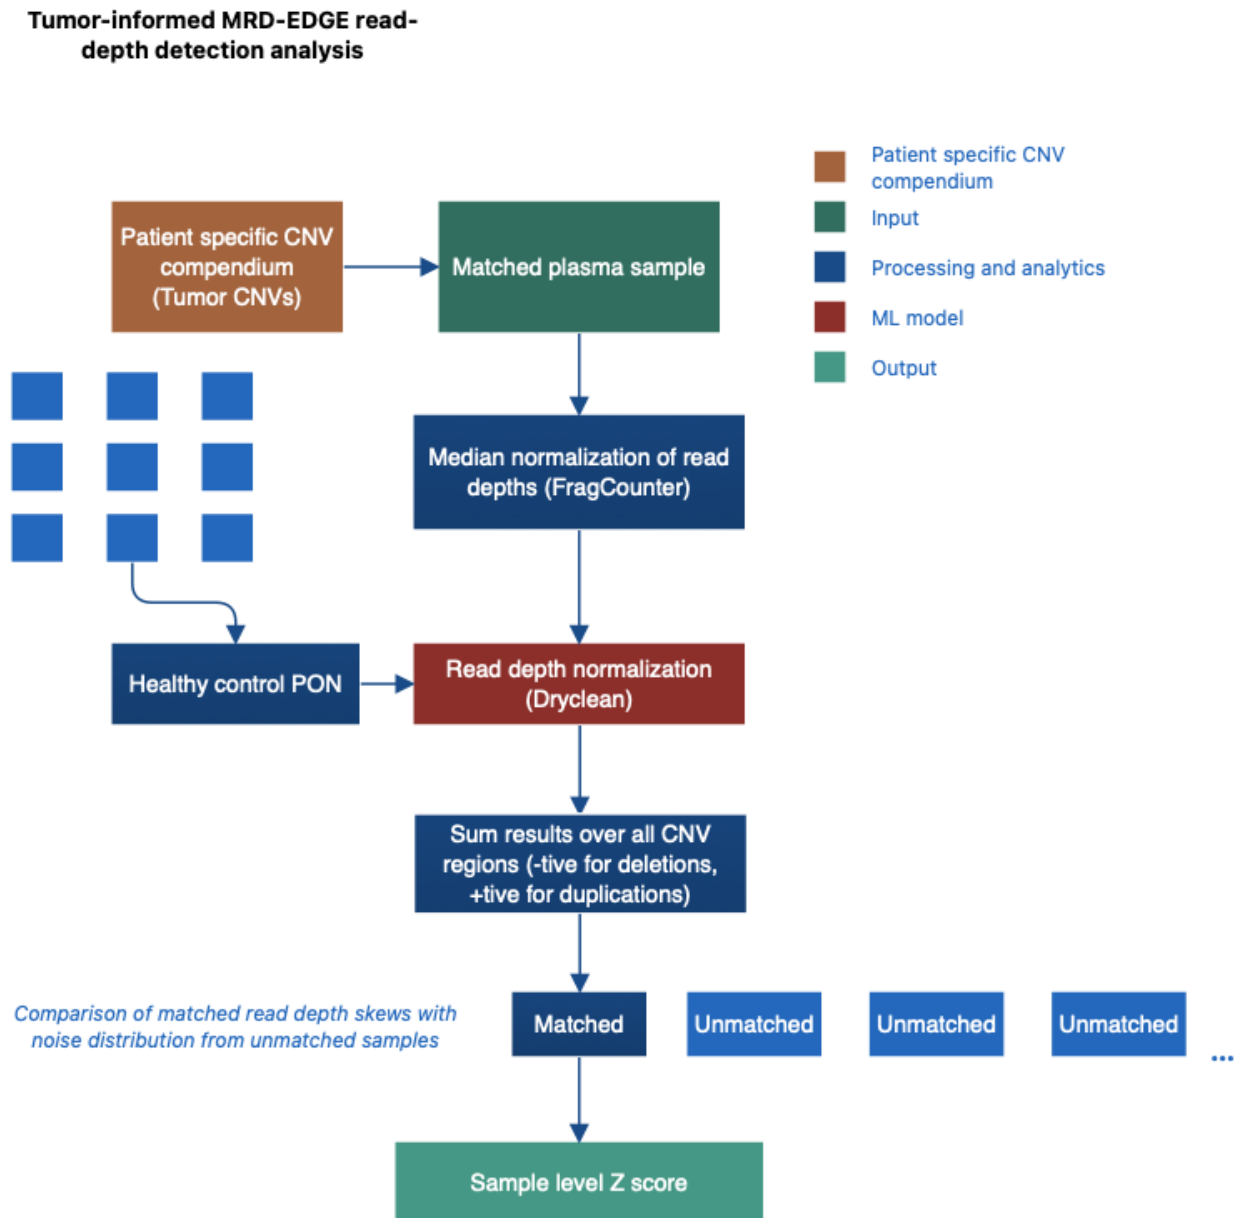

530

531 **Flowchart Fig. 4: Flowchart illustration of read depth CNV classifier**

532 A patient-specific CNV profile labels genomic windows as amplifications, deletions, and neutral  
 533 regions in tumor tissue and is subsequently applied to a plasma sample to evaluate aneuploidy-  
 534 associated read depth skews in cfDNA. Plasma read depths are median normalized and GC-  
 535 corrected at each 10-kb window of the genome. Values are passed to dryclean, a machine-  
 536 learning guided CNV denoising platform designed to detect read depth biases from a panel of

537 non-cancer plasma samples (panel of normal or PON). Foreground signal in excess of  
538 background PON signal is calculated for amplifications and deletions and aggregated at the  
539 sample level (Methods). Cumulative signal is compared to a noise distribution of foreground signal  
540 from unmatched (control) plasma samples, and the final sample-specific ctDNA tumor burden  
541 estimate is recorded as a Z score.



**Tumor-informed MRD-EDGE B-allele frequency (BAF) detection analysis**

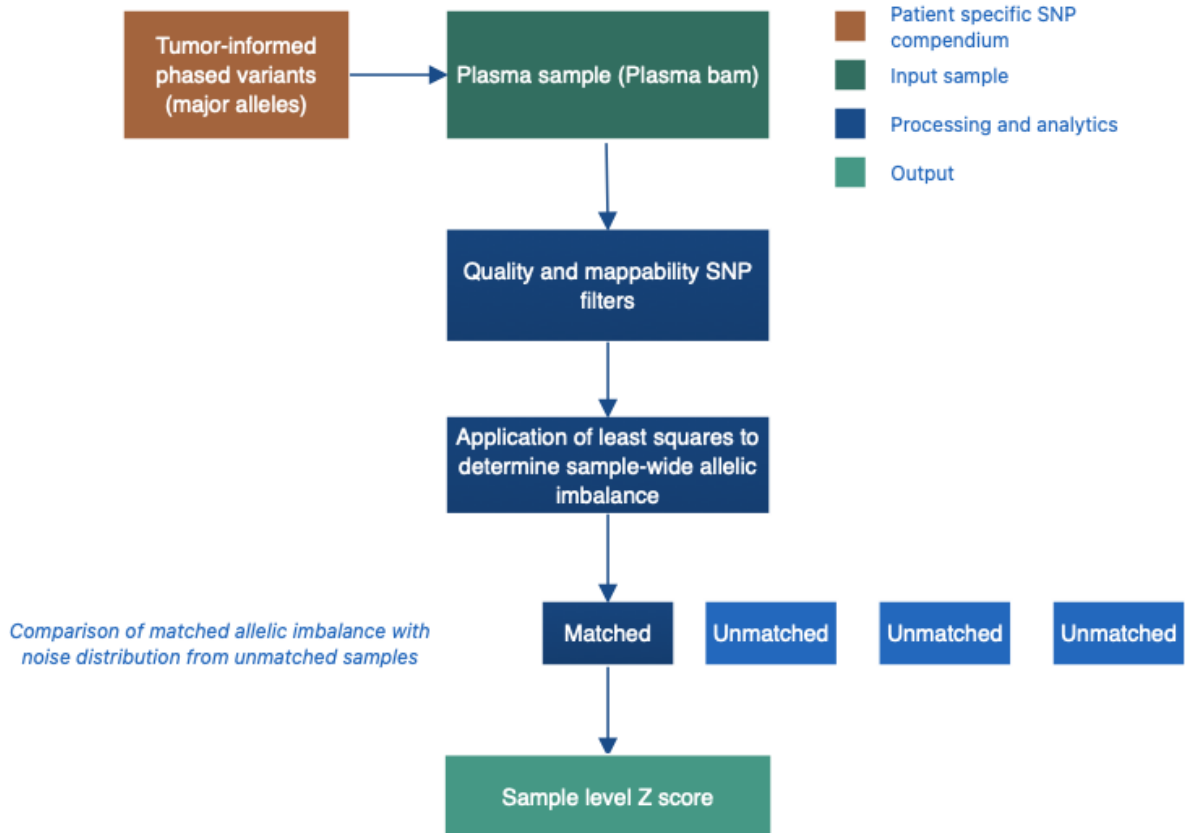

543

544 **Flowchart Fig. 5: Flowchart illustration of B-allele frequency LOH classifier**

545 A set of patient-specific single nucleotide polymorphisms (SNPs) and corresponding major alleles  
 546 are sourced from loss of heterozygosity (LOH) regions in tumor tissue. Candidate plasma SNPs  
 547 are subjected to quality filters and mappability correction (Methods). A least squares regression,  
 548 based on the expected contribution of alleles per major allele, major and minor copy number state,  
 549 and underlying plasma coverage, calculates estimated sample level ctDNA burden. The same  
 550 approach is applied to unmatched (non-cancer) controls (Methods) to form a noise distribution,  
 551 and the final result is a sample level BAF Z score indicative of plasma tumor burden.

552

**Tumor-informed MRD-EDGE fragment length entropy detection analysis**

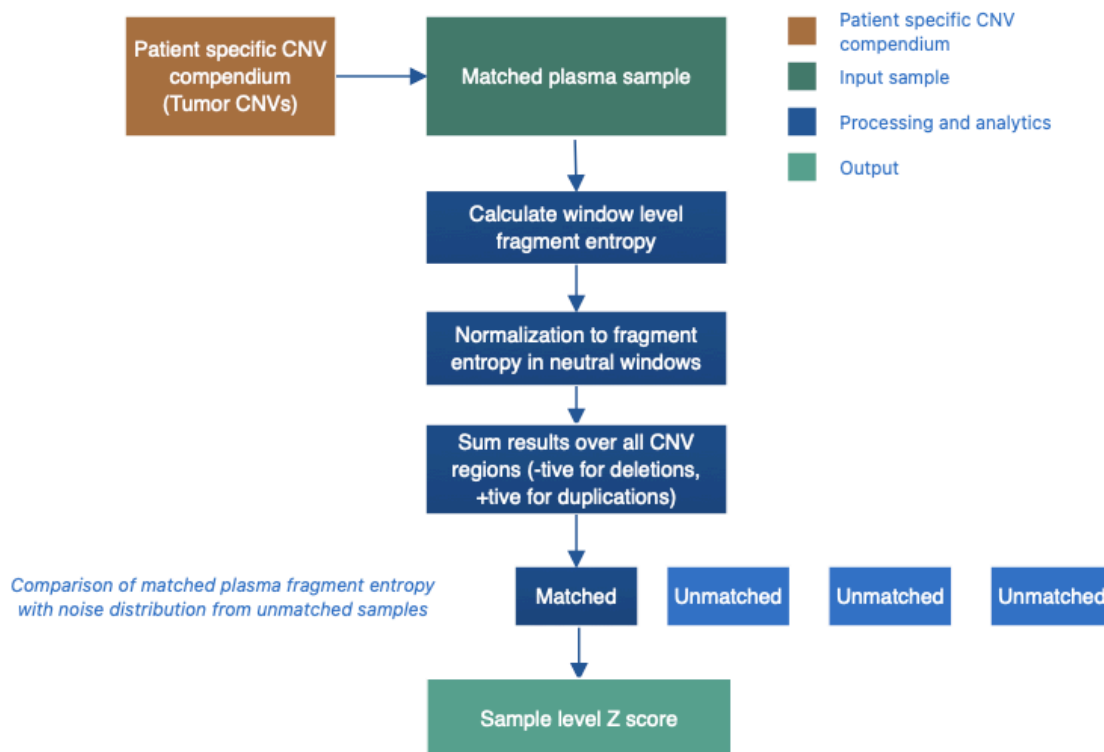

554

**555 Flowchart Fig. 6: Flowchart illustration of fragment length entropy CNV classifier**

556 A patient-specific CNV profile labels genomic windows as amplifications, deletions, and neutral  
 557 regions in tumor tissue. In plasma, fragment length entropy is calculated for 100-kb non-  
 558 overlapping genomic windows across the genome. These windows are normalized to entropy  
 559 values in neutral regions using robust Z scores. Scores are aggregated across the genome  
 560 according to segment direction, as windows in amplifications are expected to skew positive (more  
 561 fragment length entropy than neutral regions due to greater ctDNA content in the cfDNA pool)  
 562 while deletions are expected to skew negative (less fragment length entropy compared to neutral

563 regions due lesser ctDNA contribution to the plasma cfDNA pool). The aggregated entropy scores  
564 of amplifications and deletions form a sample level entropy score that is compared to a noise  
565 distribution of the same CNV regions applied to control samples. Output is a fragment length  
566 entropy Z score indicative of underlying ctDNA content.

**Aggregation of MRD-EDGE<sup>CNV</sup>  
individual classifier Z scores**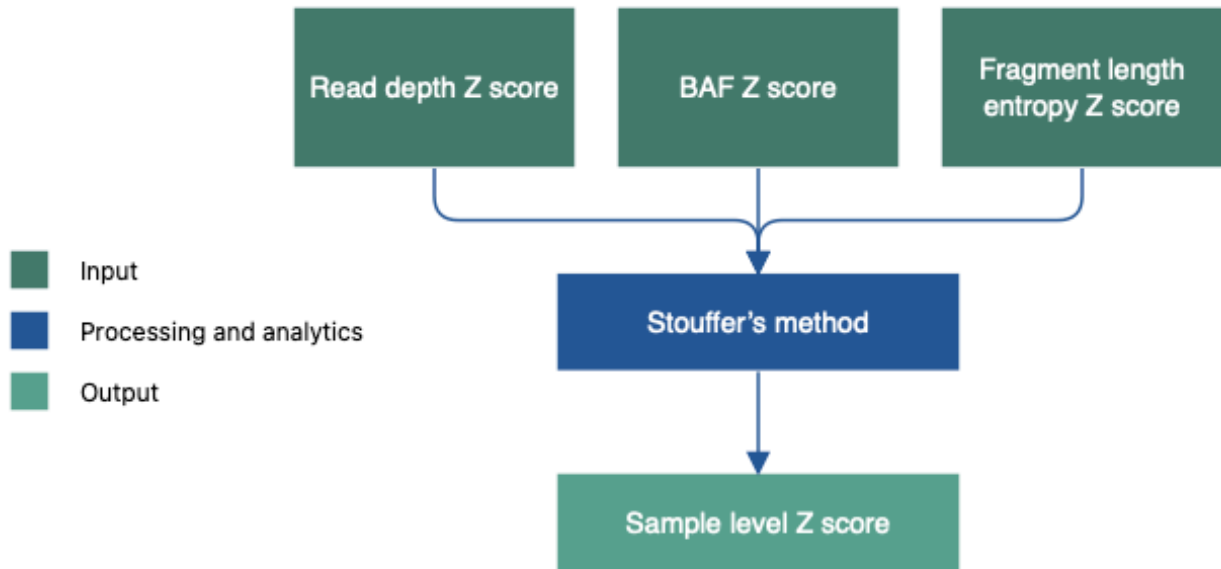

568

569 **Flowchart Figure 7: Flowchart for integrating information from 3 CNV classifiers to**  
570 **produce sample-level MRD-EDGE<sup>CNV</sup> Z score**

571 Individual read depth, BAF, and fragment length entropy Z scores are summed via Stouffer's  
572 method to form Z scores for cancer plasma samples (signal) and control plasma samples (noise  
573 distribution).

**Aggregation of tumor-informed MRD-EDGE composite Z Score**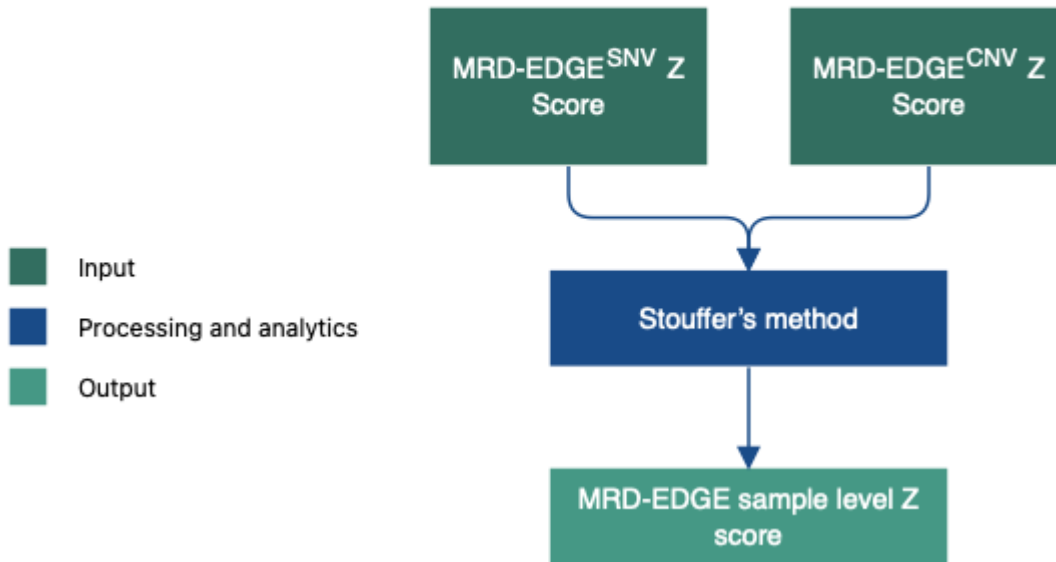

575

576 **Flowchart Figure 8: Flowchart for integrating information from MRD-EDGE<sup>SNV</sup> and MRD-**  
577 **EDGE<sup>CNV</sup> Z scores to produce sample-level MRD-EDGE Z score**

578 MRD-EDGE<sup>SNV</sup> and MRD-EDGE<sup>CNV</sup> Z scores are summed via Stouffer's method to form Z scores  
579 for cancer plasma samples (signal) and control plasma samples (noise distribution).

580

MRD-EDGE<sup>dnSNV</sup> classifier

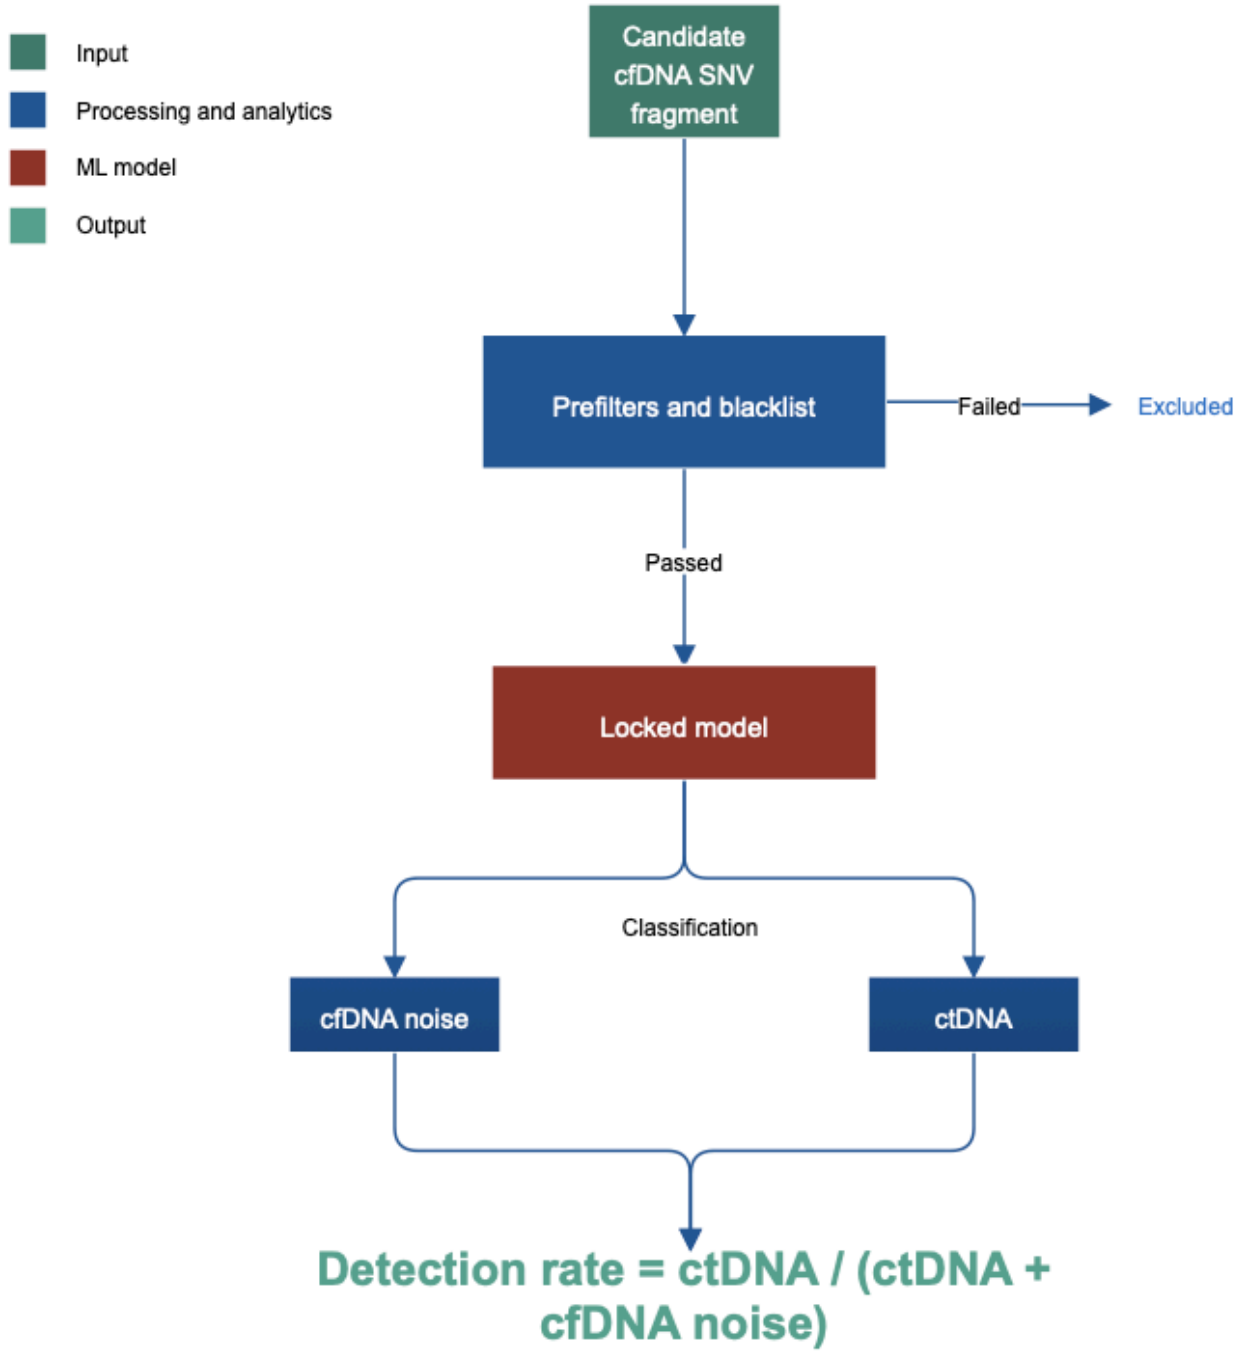

584 All cfDNA fragments with SNVs are passed through quality filters and recurrent artifact blacklists.  
585 A trained, disease-specific MRD-EDGE<sup>dnSNV</sup> deep learning classifier evaluates post-filter  
586 fragments and classifies fragments as ctDNA or noise. Detection rate is measured as the number  
587 of SNV fragments classified as ctDNA divided by the number of SNV fragments evaluated and  
588 can be used to track changes in plasma TF over time and in response to therapy.  
589

590 **References**

- 591 85. Lundberg, S. & Lee, S.-I. A Unified Approach to Interpreting Model Predictions. *arXiv*  
592 *[cs.AI]* (2017).
- 593 86. Guraya, S. Y. Pattern, Stage, and Time of Recurrent Colorectal Cancer After Curative  
594 Surgery. *Clin. Colorectal Cancer* **18**, e223–e228 (2019).
- 595 87. Srivastava, N., Hinton, G., Krizhevsky, A., Sutskever, I. & Salakhutdinov, R. Dropout: A  
596 Simple Way to Prevent Neural Networks from Overfitting. *J. Mach. Learn. Res.* **15**, 1929–1958  
597 (2014).
